# Supplementary material for: Divergent effects of economic and behavioural climate policy coupling at the individual and system levels
Source: Research Square preprint supplement (doi:10.21203/rs.3.rs-7488981/v1), 2025-09-01
Supplement: Supplementary file 1 [file 38695fb834bb43070062da3a.pdf]

## **Supplementary material: Divergent effects of economic and behavioural climate policy coupling at the individual and system levels**

Anne Günther<sup>1</sup>, Mart van der Kam<sup>1</sup>, Amir Hosein Hadian Rasanan<sup>1</sup>, Sebastian Gluth<sup>2</sup>, & Ulf J.J. Hahnel<sup>3,1</sup>

<sup>1</sup>University of Basel, Switzerland, <sup>2</sup> University of Hamburg, Germany, <sup>3</sup> Leuphana University Lüneburg, Germany

### **Table of Contents**

|                                                                                                                                                                                                                                     |    |
|-------------------------------------------------------------------------------------------------------------------------------------------------------------------------------------------------------------------------------------|----|
| Supplementary Figure 1. Attention allocation as a function of political orientation and intervention condition.....                                                                                                                 | 3  |
| Supplementary Figure 2. Agent-based model simulation results under a 2°C policy scenario .<br>.....                                                                                                                                 | 4  |
| Supplementary Figure 3. Sensitivity analysis results for country-specific agent-based models<br>.....                                                                                                                               | 6  |
| Supplementary Figure 4. Stability analysis results for country-specific agent-based models .                                                                                                                                        | 7  |
| Supplementary Figure 5. Uncertainty analysis results for country-specific agent-based models.....                                                                                                                                   | 8  |
| Supplementary Table 1. Multilevel logistic regression results for EV adoption decisions including attention to GHG emissions and savings information, additional vehicle attributes and covariates as fixed effects .....           | 9  |
| Supplementary Table 2. Multilevel regression results for attention allocation as a function of interventions and national context.....                                                                                              | 10 |
| Supplementary Table 3. Multilevel logistic regression results for EV adoption decisions including additional vehicle attributes and covariates .....                                                                                | 12 |
| Supplementary Table 4. Multilevel logistic regression results for EV adoption decisions by national context.....                                                                                                                    | 13 |
| Supplementary Table 5. Multilevel logistic regression results for EV adoption decisions including intervention x political orientation interaction by national context .....                                                        | 15 |
| Supplementary Table 6. Linear regression results on simulated EV adoption (from ABM) in 2030, 2040, 2050, by national context, showing the effects of a high carbon tax, information intervention and interaction of policies ..... | 17 |
| Supplementary Table 7. Linear regression results on simulated EV adoption (from ABM) in 2030, 2040, 2050, by national context, showing the effects of a low carbon tax, information intervention and interaction of policies .....  | 18 |

|                                                                                                                                                                                                                                                                                                    |    |
|----------------------------------------------------------------------------------------------------------------------------------------------------------------------------------------------------------------------------------------------------------------------------------------------------|----|
| Supplementary Table 8. Multilevel logistic regression results for policy support including additional policy attributes and covariates .....                                                                                                                                                       | 19 |
| Supplementary Table 9. Multilevel logistic regression results for policy support by national context.....                                                                                                                                                                                          | 20 |
| Supplementary Table 10. Multilevel logistic regression results for policy support including the three-way-interaction between tax x climate impact label x political orientation by national context.....                                                                                          | 21 |
| Supplementary Table 11. Sample characteristics compared to national benchmarks .....                                                                                                                                                                                                               | 23 |
| Supplementary Table 12. Attributes and levels of the EV choice experiment by country .....                                                                                                                                                                                                         | 24 |
| Supplementary Table 13. Attributes and levels of the policy support experiment by country                                                                                                                                                                                                          | 26 |
| Supplementary Table 14. Preregistered hypotheses and corresponding manuscript hypotheses numbering .....                                                                                                                                                                                           | 27 |
| Supplementary Table 15. Sensitivity analysis: Multilevel regression results for attention allocation excluding trials with a response time above a cut-off value of three median absolute deviations above the median, as preregistered .....                                                      | 29 |
| Supplementary Table 16. Sensitivity analysis: Multilevel regression results for attention allocation with excluding trials with a response time above a cut-off value of three median absolute deviations above the median, as preregistered, including the interaction between interventions..... | 31 |
| Supplementary Table 17. Adoption thresholds for EV adoption in ABM simulations based on Matthews Correlation Coefficient (MCC).....                                                                                                                                                                | 33 |
| Supplementary Table 18. Agent-based model: Agent-level variables.....                                                                                                                                                                                                                              | 35 |
| Supplementary Table 19. Agent-based model: State variables of the environment.....                                                                                                                                                                                                                 | 37 |
| Supplementary Table 20. Agent-based model: Technology-related variables fixed at initialization.....                                                                                                                                                                                               | 38 |

# Supplementary Figure 1. Attention allocation as a function of political orientation and intervention condition

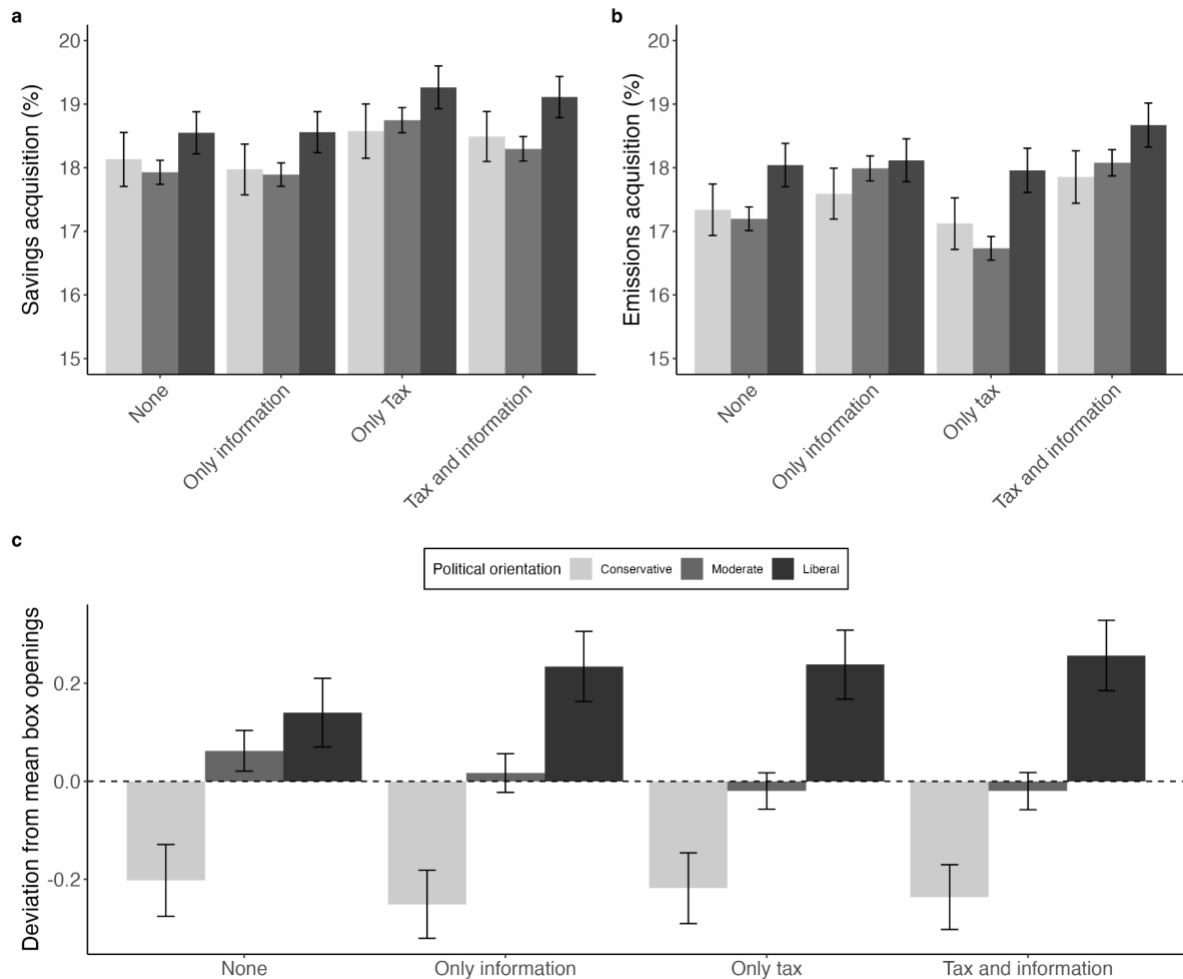

**Note.** The figure shows descriptive results of attention allocated during decision-making. Error bars represent 95% confidence intervals. **a** No significant interaction observed between the carbon tax and political orientation on attention to savings ( $b=-0.02$ , 95% CI  $[-0.15, 0.12]$ ,  $p=0.806$ ). **b** More liberal participants did not seek out significantly more information regarding GHG emissions than conservatives (main effect political orientation:  $b=-0.23$ , 95% CI  $[-0.57, 0.11]$ ,  $p=0.184$ ; evidence against preregistered H9b). No significant interaction observed between information intervention and political orientation on attention to GHG emissions ( $b=0.12$ , 95% CI  $[-0.01, 0.26]$ ,  $p=0.081$ ). **c** Deviation from mean absolute box openings by condition and political orientation. More conservative participants acquired significantly less information overall than liberals before making a decision ( $b=-0.12$ , 95% CI  $[-0.19, -0.04]$ ,  $p=0.002$ ; evidence for preregistered H9a). For the figure, political orientation was categorised as liberal (-1SD), conservative (+1SD), and moderate (between -1SD and +1SD).

**Supplementary Figure 2. Agent-based model simulation results under a 2°C policy scenario**

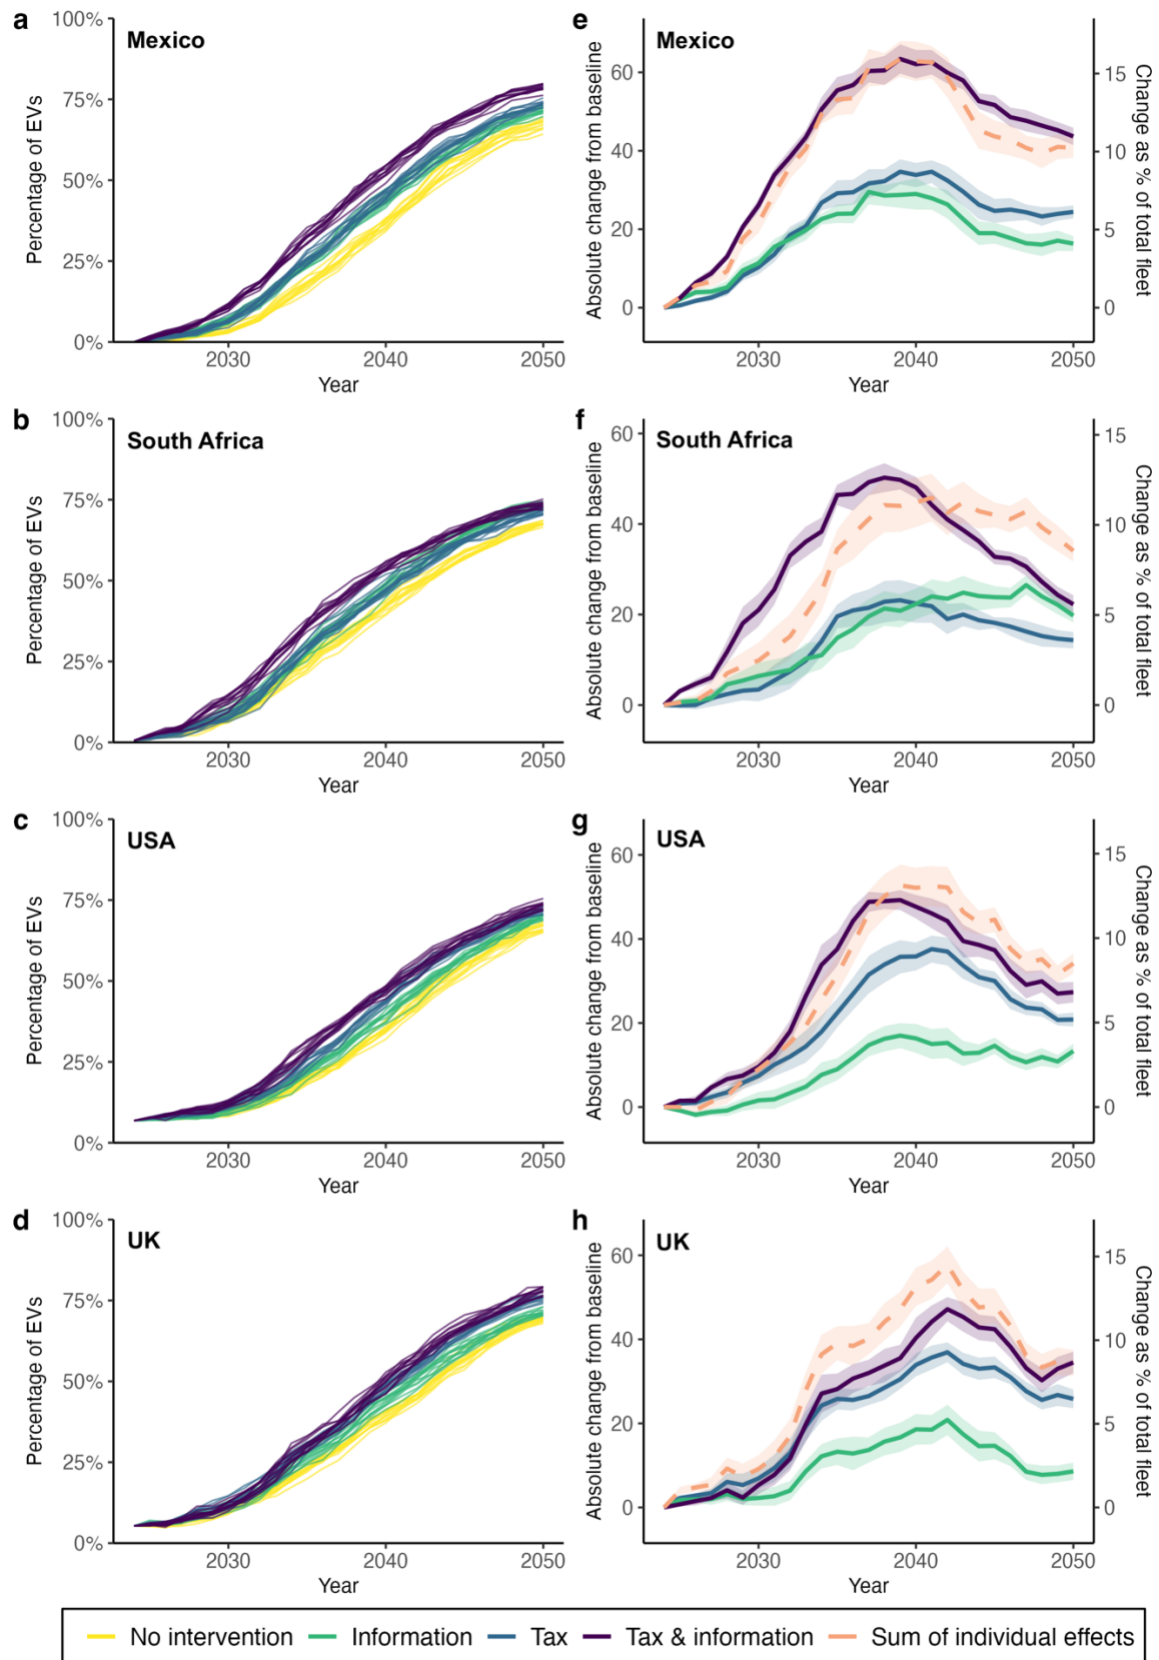

**Note. a-d** Mean diffusion curves of EV adoption under different intervention scenarios: no intervention, carbon tax only, information intervention only, and both interventions combined. Each line represents one simulation, capturing stochastic variation (e.g., agent interactions). Initial share of EVs in the simulations were based on participants' reported EV ownership in each country: Mexico=0%, South Africa=0.51%, USA=6%, UK=4.36%. These values represent realistic EV market shares. Lifecycle GHG emissions in the simulations were based on projections from ref.<sup>1</sup> under a 2 °C climate policy scenario consistent with the Paris Agreement. Underlying policies include stronger renewable energy policies, which lead to reduced lifecycle GHG emissions from EVs. **e-h** Absolute change in EV adoption over time relative to the baseline (neither tax nor information intervention, corresponding to yellow line in left panels). Lines depict adoption under different policy scenarios: combined interventions, individual interventions (carbon tax or information intervention), and their sum (additive expectation). Deviations between observed (purple line) and additive effects (orange dashed line) highlight synergistic, additive, or subadditive dynamics when interventions are combined. The left y-axis shows the absolute change in number of EVs; the right y-axis translates this into the equivalent change as a percentage of the total vehicle fleet in the agent population. Shaded areas represent the 95% range of simulated outcomes.

### Supplementary Figure 3. Sensitivity analysis results for country-specific agent-based models

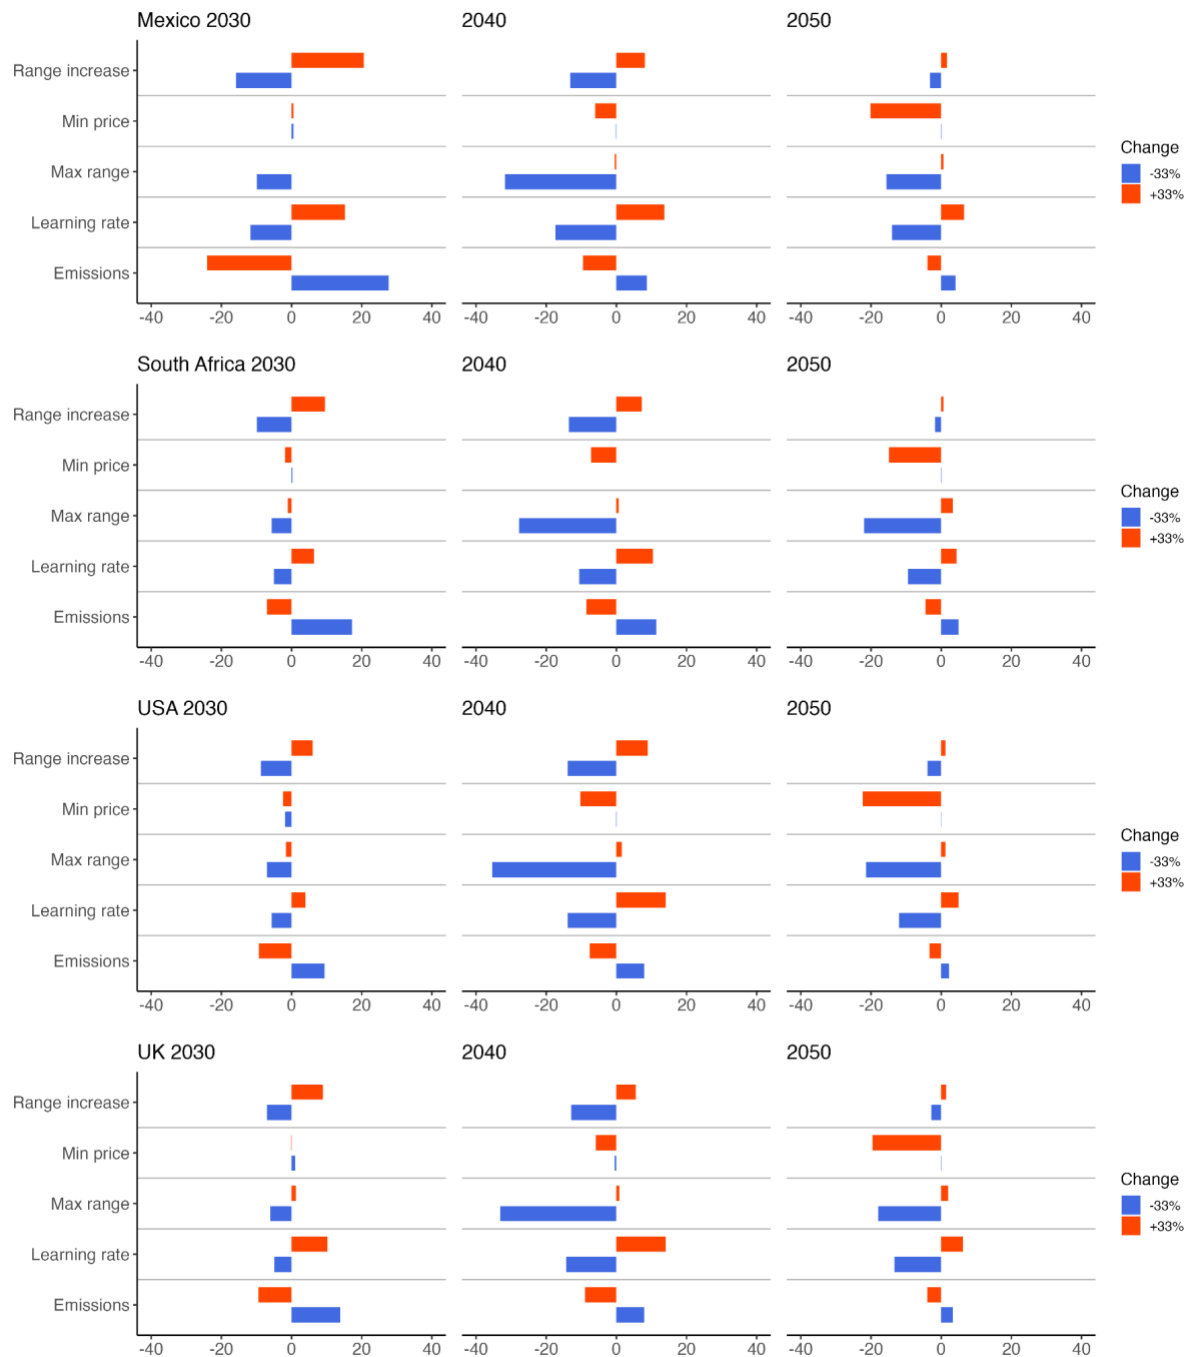

**Note.** The figure shows the percentage difference (x-axis) in mean EV adoption outcomes in 2030, 2040, and 2050 between the baseline simulation and scenarios from a one-at-a-time sensitivity analysis. In each scenario, one model parameter was varied by  $\pm 33\%$  while all others were held constant.

# Supplementary Figure 4. Stability analysis results for country-specific agent-based models

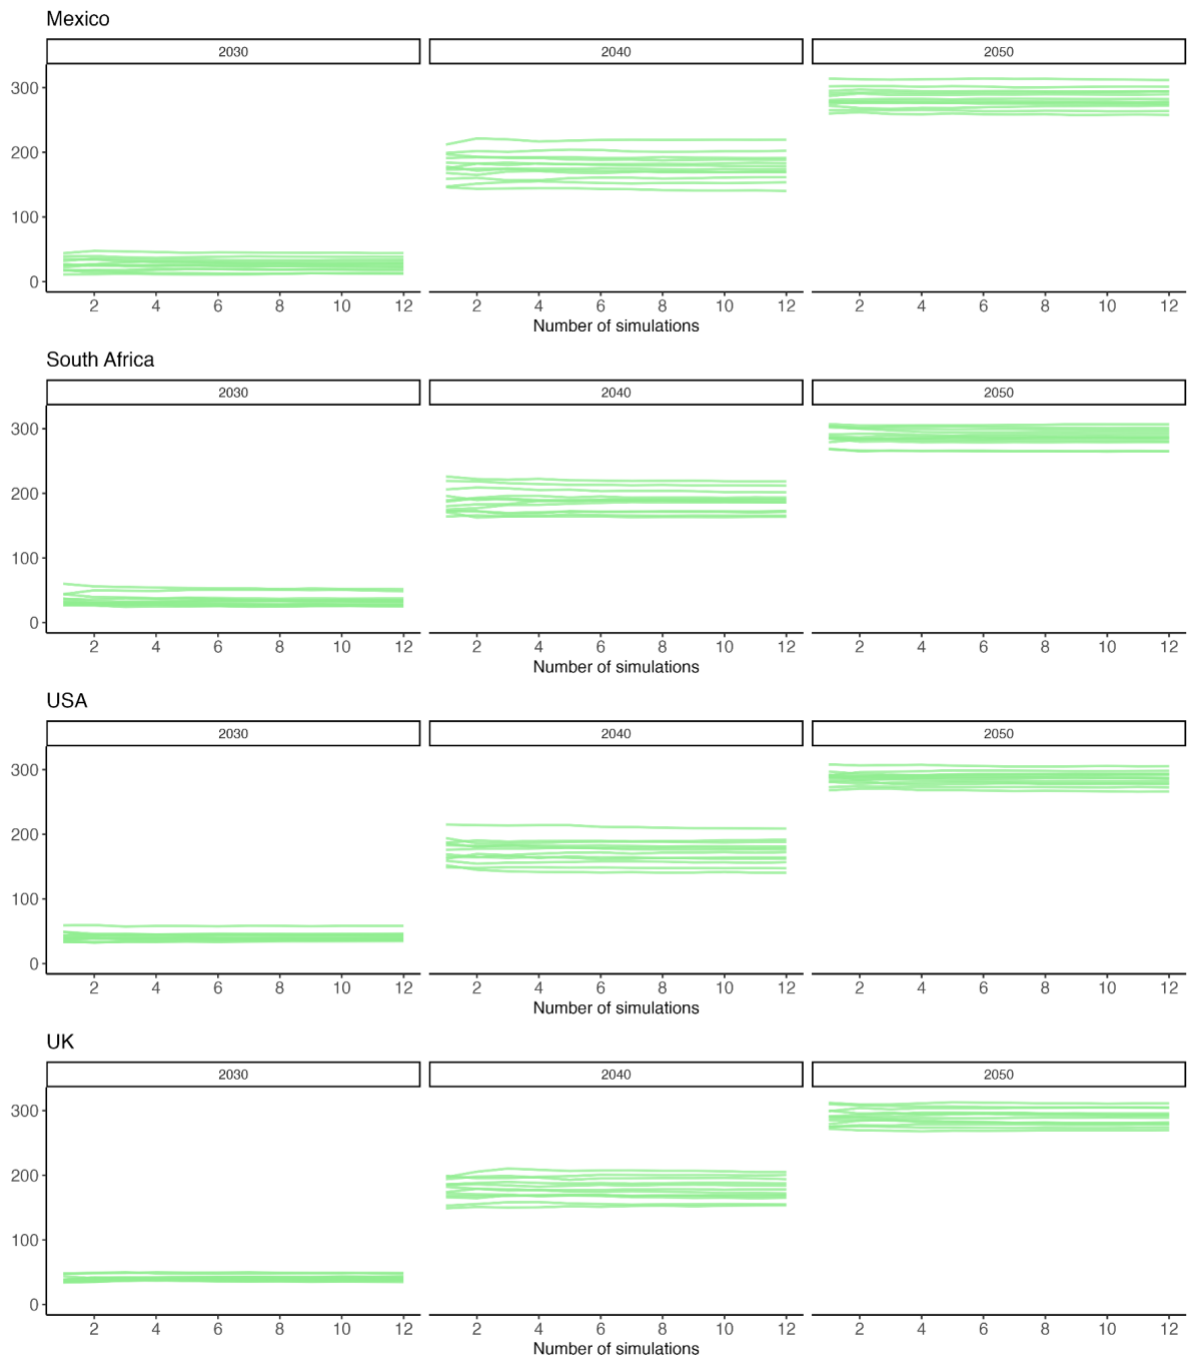

**Note.** The figure shows the mean EV adoption outcomes across increasing numbers of simulation repetitions (1–12) for each scenario. Stability analysis results indicate that using 12 repetitions was sufficient to ensure consistency in outcomes across scenarios.

## Supplementary Figure 5. Uncertainty analysis results for country-specific agent-based models

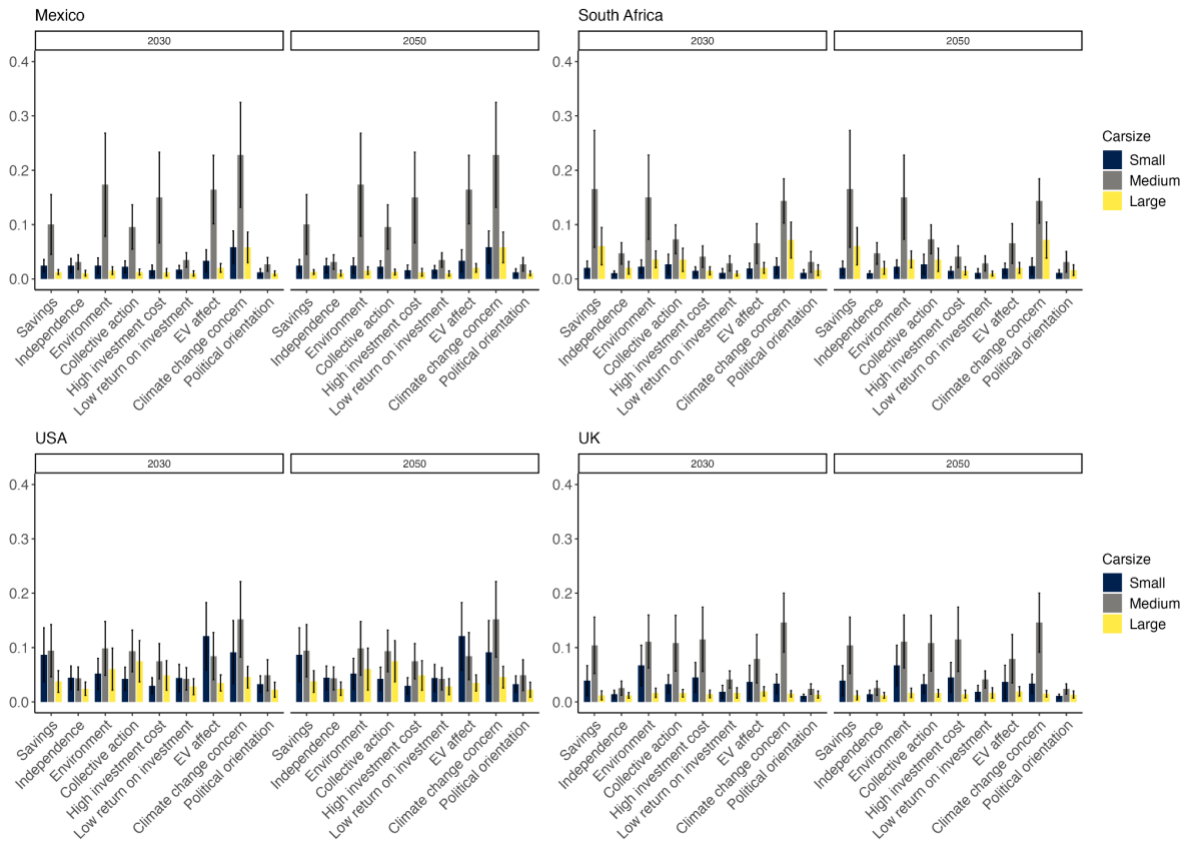

**Note.** The figure presents Sobol total sensitivity indices for EV adoption in 2030 and 2050. Each bar indicates the influence of a behavioural parameter on EV adoption, disaggregated by car size. Behavioural parameters include the subjective probabilities for benefits and risks from adopting EVs, affect toward EVs, and political orientation. Error bars represent CIs derived from the Sobol sensitivity analysis. Input parameter distributions were specified as normal distributions using regression coefficient estimates and standard errors from the regression models.



**Supplementary Table 1. Multilevel logistic regression results for EV adoption decisions including attention to GHG emissions and savings information, additional vehicle attributes and covariates as fixed effects**

| Fixed effects                                        | EV adoption decision |               |        |
|------------------------------------------------------|----------------------|---------------|--------|
|                                                      | OR                   | CI            | p      |
| (Intercept)                                          | 0.38                 | 0.28 – 0.51   | <0.001 |
| Car size [medium]                                    | 1.75                 | 1.40 – 2.19   | <0.001 |
| Car size [small]                                     | 2.06                 | 1.62 – 2.64   | <0.001 |
| Price [medium]                                       | 0.28                 | 0.21 – 0.36   | <0.001 |
| Price [high]                                         | 0.08                 | 0.05 – 0.13   | <0.001 |
| Savings [medium]                                     | 1.11                 | 0.98 – 1.25   | 0.093  |
| Savings [high]                                       | 1.18                 | 1.04 – 1.33   | 0.009  |
| Battery range [medium]                               | 5.48                 | 4.85 – 6.19   | <0.001 |
| Battery range [high]                                 | 13.72                | 12.13 – 15.51 | <0.001 |
| Emissions [medium]                                   | 0.80                 | 0.71 – 0.91   | <0.001 |
| Emissions [high]                                     | 0.54                 | 0.48 – 0.61   | <0.001 |
| Neighbourhood [medium]                               | 1.24                 | 1.09 – 1.39   | 0.001  |
| Neighbourhood [high]                                 | 1.60                 | 1.41 – 1.80   | <0.001 |
| Attention to GHG emissions (z-scaled)                | 1.03                 | 1.01 – 1.05   | 0.001  |
| Attention to savings (z-scaled)                      | 1.09                 | 1.08 – 1.12   | <0.001 |
| Carbon tax [low]                                     | 1.04                 | 1.00 – 1.09   | 0.046  |
| Carbon tax [high]                                    | 1.40                 | 1.34 – 1.46   | <0.001 |
| Information intervention [yes]                       | 1.26                 | 1.22 – 1.30   | <0.001 |
| Age                                                  | 0.76                 | 0.70 – 0.83   | <0.001 |
| Income                                               | 1.19                 | 1.09 – 1.29   | <0.001 |
| Political orientation                                | 0.84                 | 0.78 – 0.91   | <0.001 |
| <b>Random effects</b>                                |                      |               |        |
| $\sigma^2$                                           | 3.29                 |               |        |
| $\tau_{00}$ participant_id                           | 2.49                 |               |        |
| $\tau_{00}$ current_task                             | 0.01                 |               |        |
| $\tau_{00}$ country                                  | 0.02                 |               |        |
| $\tau_{11}$ country.price_medium                     | 0.05                 |               |        |
| $\tau_{11}$ country.price_high                       | 0.21                 |               |        |
| $\rho_{01}$ country.price_medium                     | -0.21                |               |        |
| $\rho_{01}$ country.price_high                       | -0.00                |               |        |
| ICC                                                  | 0.44                 |               |        |
| N participant_id                                     | 1589                 |               |        |
| N current_task                                       | 18                   |               |        |
| N country                                            | 4                    |               |        |
| Observations                                         | 110978               |               |        |
| Marginal R <sup>2</sup> / Conditional R <sup>2</sup> | 0.305 / 0.612        |               |        |

**Supplementary Table 2. Multilevel regression results for attention allocation as a function of interventions and national context**

|                                | Frequency of savings       |                             | Likelihood of viewing savings first |                         | Frequency emissions        |                             | Likelihood of viewing emissions first |                         |
|--------------------------------|----------------------------|-----------------------------|-------------------------------------|-------------------------|----------------------------|-----------------------------|---------------------------------------|-------------------------|
|                                | <i>b</i> [CI]              | <i>p</i>                    | OR [CI]                             | <i>p</i>                | <i>b</i> [CI]              | <i>p</i>                    | OR [CI]                               | <i>p</i>                |
| <b>Fixed effects</b>           |                            |                             |                                     |                         |                            |                             |                                       |                         |
| Intercept                      | 16.97<br>[15.94,<br>17.99] |                             | 0.19 [0.18,<br>0.21]                |                         | 17.96<br>[16.87,<br>19.05] |                             | 0.19 [0.17,<br>0.21]                  |                         |
| Carbon tax [Yes]               | 0.38 [0.11,<br>0.65]       | <b>0.006</b>                | 1.04 [0.98,<br>1.10]                | 0.21<br>9               | -0.06 [-0.20,<br>0.07]     | 0.361                       | 1.02 [0.99,<br>1.05]                  | 0.30<br>9               |
| Country [South Africa]         | 0.96 [0.05,<br>1.87]       | <b>0.040</b>                | 1.08 [0.99,<br>1.17]                | 0.08<br>9               | 0.42 [-0.55,<br>1.39]      | 0.394                       | 1.09 [1.00,<br>1.20]                  | <b>0.05</b><br><b>5</b> |
| Country [UK]                   | -0.58 [-1.53,<br>0.36]     | <b>0.226</b>                | 0.94 [0.86,<br>1.03]                | 0.17<br>3               | -2.88 [-3.88,<br>-1.87]    | <b>&lt;0.00</b><br><b>1</b> | 0.85 [0.77,<br>0.93]                  | <b>0.00</b><br><b>1</b> |
| Country [USA]                  | -0.18 [-1.14,<br>0.77]     | 0.711                       | 0.96 [0.88,<br>1.05]                | 0.36<br>9               | -1.98 [-2.99,<br>-0.96]    | <b>&lt;0.00</b><br><b>1</b> | 0.89 [0.81,<br>0.98]                  | <b>0.01</b><br><b>8</b> |
| Information intervention [Yes] | -0.19 [-0.32,<br>-0.05]    | <b>0.007</b>                | 0.99 [0.96,<br>1.03]                | 0.74<br>3               | 0.09 [-0.19,<br>0.36]      | <b>0.530</b>                | 1.04 [0.98,<br>1.10]                  | <b>0.23</b><br><b>1</b> |
| Car [medium]                   | 0.71 [-0.15,<br>1.57]      | 0.106                       | 1.05 [0.97,<br>1.12]                | 0.22<br>5               | 0.18 [-0.74,<br>1.10]      | <b>0.706</b>                | 1.04 [0.96,<br>1.13]                  | 0.31<br>1               |
| Car [small]                    | 1.51 [0.56,<br>2.45]       | <b>0.002</b>                | 1.14 [1.06,<br>1.24]                | <b>0.00</b><br><b>1</b> | 0.83 [-0.18,<br>1.84]      | <b>0.107</b>                | 1.10 [1.00,<br>1.20]                  | <b>0.03</b><br><b>8</b> |
| Price [medium]                 | -0.15 [-0.31,<br>0.02]     | 0.084                       | 0.99 [0.95,<br>1.02]                | 0.46<br>5               | -0.17 [-0.34,<br>-0.00]    | <b>0.049</b>                | 0.99 [0.95,<br>1.03]                  | 0.54<br>5               |
| Price [high]                   | -0.28 [-0.44,<br>-0.11]    | <b>0.001</b>                | 0.98 [0.94,<br>1.02]                | 0.25<br>0               | -0.22 [-0.39,<br>-0.06]    | <b>0.008</b>                | 0.97 [0.93,<br>1.01]                  | 0.12<br>1               |
| Savings [medium]               | 0.05 [-0.12,<br>0.21]      | 0.584                       | 0.98 [0.95,<br>1.02]                | 0.35<br>1               | -0.08 [-0.25,<br>0.09]     | <b>0.347</b>                | 1.03 [1.00,<br>1.07]                  | 0.08<br>6               |
| Savings [high]                 | -0.02 [-0.18,<br>0.15]     | 0.845                       | 0.99 [0.96,<br>1.03]                | 0.68<br>3               | 0.00 [-0.16,<br>0.17]      | <b>0.974</b>                | 1.02 [0.98,<br>1.06]                  | 0.35<br>5               |
| Range [medium]                 | 0.55 [0.38,<br>0.72]       | <b>&lt;0.00</b><br><b>1</b> | 1.02 [0.99,<br>1.06]                | 0.23<br>1               | 0.25 [0.09,<br>0.42]       | <b>0.003</b>                | 1.01 [0.97,<br>1.05]                  | 0.56<br>7               |
| Range [high]                   | 0.68 [0.52,<br>0.85]       | <b>&lt;0.00</b><br><b>1</b> | 1.05 [1.01,<br>1.09]                | <b>0.01</b><br><b>5</b> | 0.36 [0.19,<br>0.53]       | <b>&lt;0.00</b><br><b>1</b> | 1.04 [1.00,<br>1.08]                  | <b>0.04</b><br><b>9</b> |
| Emissions [medium]             | -0.03 [-0.20,<br>0.14]     | 0.706                       | 1.02 [0.98,<br>1.05]                | 0.41<br>7               | 0.06 [-0.11,<br>0.22]      | 0.506                       | 1.01 [0.98,<br>1.05]                  | 0.46<br>3               |
| Emissions [high]               | 0.04 [-0.13,<br>0.21]      | <b>0.630</b>                | 1.01 [0.97,<br>1.05]                | 0.53<br>9               | 0.06 [-0.10,<br>0.23]      | <b>0.466</b>                | 1.00 [0.96,<br>1.04]                  | 0.97<br>9               |
| Neighbourhood [medium]         | 0.02 [-0.15,<br>0.19]      | 0.806                       | 1.01 [0.97,<br>1.05]                | 0.59<br>0               | -0.14 [-0.31,<br>0.02]     | 0.090                       | 0.99 [0.96,<br>1.03]                  | 0.69<br>0               |
| Neighbourhood [high]           | -0.01 [-0.18,<br>0.16]     | 0.914                       | 0.98 [0.95,<br>1.02]                | 0.36<br>4               | 0.02 [-0.15,<br>0.19]      | 0.831                       | 1.01 [0.97,<br>1.05]                  | 0.76<br>1               |

|                                                      | Frequency of savings |              | Likelihood of viewing savings first |          | Frequency emissions |                   | Likelihood of viewing emissions first |               |
|------------------------------------------------------|----------------------|--------------|-------------------------------------|----------|---------------------|-------------------|---------------------------------------|---------------|
|                                                      | <i>b</i> [CI]        | <i>p</i>     | OR [CI]                             | <i>p</i> | <i>b</i> [CI]       | <i>p</i>          | OR [CI]                               | <i>p</i>      |
| Age                                                  | -0.09 [-0.41, 0.24]  | <b>0.610</b> | 1.00 [0.98, 1.03]                   | 0.79 7   | 0.44 [0.09, 0.79]   | <b>0.014</b>      | 1.03 [1.00, 1.06]                     | <b>0.04 3</b> |
| Income                                               | 0.09 [-0.24, 0.41]   | <b>0.592</b> | 1.00 [0.97, 1.03]                   | 0.90 4   | -0.00 [-0.35, 0.35] | <b>0.998</b>      | 1.00 [0.97, 1.03]                     | <b>0.81 7</b> |
| Political orientation                                | -0.12 [-0.43, 0.19]  | 0.464        | 0.99 [0.97, 1.02]                   | 0.46 8   | -0.17 [-0.50, 0.16] | 0.319             | 0.99 [0.96, 1.01]                     | 0.30 4        |
| Tax [Yes] × country [South Africa]                   | 0.26 [-0.13, 0.65]   | 0.192        | 1.02 [0.93, 1.11]                   | 0.69 6   |                     |                   |                                       |               |
| Tax [Yes] × country [UK]                             | 0.33 [-0.06, 0.71]   | 0.095        | 1.01 [0.93, 1.11]                   | 0.75 0   |                     |                   |                                       |               |
| Tax [Yes] × country [USA]                            | 0.32 [-0.07, 0.70]   | 0.109        | 1.00 [0.92, 1.09]                   | 0.99 6   |                     |                   |                                       |               |
| Information [Yes] × country [South Africa]           |                      |              |                                     |          | 1.08 [0.69, 1.46]   | <b>&lt;0.00 1</b> | 1.04 [0.95, 1.13]                     | <b>0.43 3</b> |
| Information [Yes] × country [UK]                     |                      |              |                                     |          | 1.30 [0.91, 1.68]   | <b>&lt;0.00 1</b> | 1.03 [0.94, 1.12]                     | 0.52 9        |
| Information [Yes] × country [USA]                    |                      |              |                                     |          | 0.65 [0.26, 1.03]   | <b>0.001</b>      | 1.01 [0.93, 1.11]                     | 0.78 0        |
| <b>Random effects</b>                                |                      |              |                                     |          |                     |                   |                                       |               |
| $\sigma^2$                                           | 134.61               |              | 3.29                                |          | 134.28              |                   | 3.29                                  |               |
| $\tau_{00}$ participant_id                           | 37.28                |              | 0.17                                |          | 42.81               |                   | 0.22                                  |               |
| ICC                                                  | 0.22                 |              | 0.05                                |          | 0.24                |                   | 0.06                                  |               |
| N participant_id                                     | 1589                 |              | 1589                                |          | 1589                |                   | 1589                                  |               |
| Observations                                         | 110978               |              | 110978                              |          | 110978              |                   | 110978                                |               |
| Marginal R <sup>2</sup> / Conditional R <sup>2</sup> | 0.004 / 0.220        |              | 0.002 / 0.051                       |          | 0.011 / 0.250       |                   | 0.003 / 0.067                         |               |

**Supplementary Table 3. Multilevel logistic regression results for EV adoption decisions including additional vehicle attributes and covariates**

| Fixed effects                                        | EV adoption decision |              |          |
|------------------------------------------------------|----------------------|--------------|----------|
|                                                      | OR                   | CI           | <i>p</i> |
| (Intercept)                                          | 0.36                 | 0.27, 0.49   | <0.001   |
| Car size [medium]                                    | 1.80                 | 1.44, 2.26   | <0.001   |
| Car size [small]                                     | 2.20                 | 1.72, 2.82   | <0.001   |
| Price [medium]                                       | 0.28                 | 0.22, 0.36   | <0.001   |
| Price [high]                                         | 0.08                 | 0.05, 0.13   | <0.001   |
| Savings [medium]                                     | 1.11                 | 0.98, 1.26   | 0.089    |
| Savings [high]                                       | 1.17                 | 1.04, 1.33   | 0.011    |
| Battery range [medium]                               | 5.40                 | 4.77, 6.10   | <0.001   |
| Battery range [high]                                 | 13.39                | 11.83, 15.16 | <0.001   |
| Neighbourhood [medium]                               | 1.23                 | 1.09, 1.39   | 0.001    |
| Neighbourhood [high]                                 | 1.60                 | 1.41, 1.81   | <0.001   |
| Emissions [medium]                                   | 0.80                 | 0.71, 0.91   | <0.001   |
| Emissions [high]                                     | 0.54                 | 0.48, 0.61   | <0.001   |
| Information intervention [yes]                       | 1.26                 | 1.22, 1.29   | <0.001   |
| Carbon tax [low]                                     | 1.05                 | 1.00, 1.09   | 0.029    |
| Carbon tax [high]                                    | 1.40                 | 1.34, 1.46   | <0.001   |
| Age                                                  | 0.75                 | 0.69, 0.82   | <0.001   |
| Income                                               | 1.17                 | 1.08, 1.28   | <0.001   |
| <b>Random effects</b>                                |                      |              |          |
| $\sigma^2$                                           | 3.29                 |              |          |
| $\tau_{00}$ participant_id                           | 2.52                 |              |          |
| $\tau_{00}$ current_task                             | 0.01                 |              |          |
| $\tau_{00}$ country                                  | 0.02                 |              |          |
| $\tau_{11}$ country.price_medium                     | 0.05                 |              |          |
| $\tau_{11}$ country.price_high                       | 0.21                 |              |          |
| $\rho_{01}$ country.price_medium                     | -0.12                |              |          |
| $\rho_{01}$ country.price_high                       | 0.07                 |              |          |
| ICC                                                  | 0.45                 |              |          |
| N participant_id                                     | 1589                 |              |          |
| N current_task                                       | 18                   |              |          |
| N country                                            | 4                    |              |          |
| Observations                                         | 114408               |              |          |
| Marginal R <sup>2</sup> / Conditional R <sup>2</sup> | 0.296 / 0.610        |              |          |

**Supplementary Table 4. Multilevel logistic regression results for EV adoption decisions by national context**

|                        | USA                     |                  | UK                      |                  | South Africa         |                  | Mexico                  |                  |
|------------------------|-------------------------|------------------|-------------------------|------------------|----------------------|------------------|-------------------------|------------------|
|                        | OR                      | <i>p</i>         | OR                      | <i>p</i>         | OR                   | <i>p</i>         | OR                      | <i>p</i>         |
| <b>Fixed effects</b>   |                         |                  |                         |                  |                      |                  |                         |                  |
| (Intercept)            | 0.19<br>[0.12, 0.29]    |                  | 0.12<br>[0.06, 0.24]    |                  | 0.92<br>[0.71, 1.20] |                  | 0.70<br>[0.45, 1.07]    |                  |
| Car size [medium]      | 2.58<br>[1.60, 4.17]    | <b>&lt;0.001</b> | 4.28<br>[2.18, 8.40]    | <b>&lt;0.001</b> | 0.95<br>[0.70, 1.27] | 0.716            | 1.37<br>[0.90, 2.07]    | 0.141            |
| Car size [small]       | 4.98<br>[2.85, 8.71]    | <b>&lt;0.001</b> | 3.79<br>[1.90, 7.54]    | <b>&lt;0.001</b> | 1.11<br>[0.79, 1.56] | 0.559            | 1.52<br>[0.98, 2.34]    | 0.061            |
| Price [medium]         | 0.25<br>[0.21, 0.29]    | <b>&lt;0.001</b> | 0.22<br>[0.17, 0.27]    | <b>&lt;0.001</b> | 0.46<br>[0.43, 0.50] | <b>&lt;0.001</b> | 0.22<br>[0.20, 0.25]    | <b>&lt;0.001</b> |
| Price [high]           | 0.07<br>[0.06, 0.08]    | <b>&lt;0.001</b> | 0.04<br>[0.04, 0.06]    | <b>&lt;0.001</b> | 0.21<br>[0.19, 0.22] | <b>&lt;0.001</b> | 0.06<br>[0.05, 0.06]    | <b>&lt;0.001</b> |
| Savings [medium]       | 1.10<br>[0.95, 1.27]    | 0.217            | 1.23<br>[0.99, 1.53]    | 0.060            | 1.04<br>[0.97, 1.12] | 0.244            | 1.11<br>[0.98, 1.26]    | 0.102            |
| Savings [high]         | 1.04<br>[0.90, 1.20]    | 0.607            | 1.19<br>[0.96, 1.47]    | 0.113            | 1.19<br>[1.11, 1.28] | <b>&lt;0.001</b> | 1.34<br>[1.18, 1.51]    | <b>&lt;0.001</b> |
| Range [medium]         | 6.52<br>[5.61, 7.56]    | <b>&lt;0.001</b> | 11.25<br>[9.07, 13.95]  | <b>&lt;0.001</b> | 3.36<br>[3.14, 3.59] | <b>&lt;0.001</b> | 4.61<br>[4.08, 5.20]    | <b>&lt;0.001</b> |
| Range [high]           | 14.74<br>[12.65, 17.16] | <b>&lt;0.001</b> | 30.70<br>[24.63, 38.26] | <b>&lt;0.001</b> | 7.65<br>[7.10, 8.24] | <b>&lt;0.001</b> | 12.86<br>[11.33, 14.60] | <b>&lt;0.001</b> |
| Neighbourhood [medium] | 1.20<br>[1.04, 1.39]    | <b>0.015</b>     | 1.12<br>[0.91, 1.39]    | 0.286            | 1.35<br>[1.26, 1.44] | <b>&lt;0.001</b> | 1.22<br>[1.08, 1.37]    | <b>0.001</b>     |
| Neighbourhood [high]   | 1.72<br>[1.48, 2.00]    | <b>&lt;0.001</b> | 1.35<br>[1.09, 1.68]    | <b>0.006</b>     | 1.63<br>[1.52, 1.75] | <b>&lt;0.001</b> | 1.60<br>[1.41, 1.81]    | <b>&lt;0.001</b> |
| Emissions [medium]     | 0.92<br>[0.80, 1.07]    | 0.302            | 0.97<br>[0.79, 1.21]    | 0.813            | 0.68<br>[0.63, 0.73] | <b>&lt;0.001</b> | 0.70<br>[0.62, 0.80]    | <b>&lt;0.001</b> |
| Emissions [high]       | 0.62<br>[0.54, 0.72]    | <b>&lt;0.001</b> | 0.62<br>[0.50, 0.77]    | <b>&lt;0.001</b> | 0.51<br>[0.48, 0.55] | <b>&lt;0.001</b> | 0.46<br>[0.41, 0.52]    | <b>&lt;0.001</b> |
| Information [yes]      | 1.26<br>[1.18, 1.35]    | <b>&lt;0.001</b> | 1.16<br>[1.08, 1.23]    | <b>&lt;0.001</b> | 1.24<br>[1.17, 1.31] | <b>&lt;0.001</b> | 1.37<br>[1.29, 1.45]    | <b>&lt;0.001</b> |
| Carbon tax [low]       | 1.07<br>[0.98, 1.16]    | 0.138            | 1.00<br>[0.92, 1.10]    | 0.966            | 1.03<br>[0.96, 1.10] | 0.456            | 1.09<br>[1.01, 1.18]    | <b>0.030</b>     |

|                                                         | USA                                      |                  | UK                                       |                  | South Africa            |                  | Mexico                                   |                  |
|---------------------------------------------------------|------------------------------------------|------------------|------------------------------------------|------------------|-------------------------|------------------|------------------------------------------|------------------|
|                                                         | OR                                       | p                | OR                                       | p                | OR                      | p                | OR                                       | p                |
| Carbon tax [high]                                       | 1.48<br>[1.36, 1.62]                     | <b>&lt;0.001</b> | 1.51<br>[1.38, 1.66]                     | <b>&lt;0.001</b> | 1.24<br>[1.16, 1.33]    | <b>&lt;0.001</b> | 1.45<br>[1.34, 1.57]                     | <b>&lt;0.001</b> |
| Age                                                     | 0.62<br>[0.52, 0.75]                     | <b>&lt;0.001</b> | 0.81<br>[0.68, 0.97]                     | <b>0.024</b>     | 0.89<br>[0.78, 1.02]    | 0.103            | 0.89<br>[0.75, 1.07]                     | 0.212            |
| Income                                                  | 1.62<br>[1.31, 2.00]                     | <b>&lt;0.001</b> | 1.27<br>[1.01, 1.61]                     | <b>0.043</b>     | 1.00<br>[0.90, 1.12]    | 0.940            | 1.03<br>[0.90, 1.18]                     | 0.639            |
| Political orientation                                   | 0.61<br>[0.50, 0.75]                     | <b>&lt;0.001</b> | 0.84<br>[0.69, 1.02]                     | 0.079            | 0.96<br>[0.85, 1.09]    | 0.557            | 0.94<br>[0.83, 1.07]                     | 0.379            |
| <b>Random effects</b>                                   |                                          |                  |                                          |                  |                         |                  |                                          |                  |
| $\sigma^2$                                              | 3.29                                     |                  | 3.29                                     |                  | 3.29                    |                  | 3.29                                     |                  |
| $\tau_{00}$                                             | 3.74 participant_id<br>0.01 current_task |                  | 3.82 participant_id<br>0.03 current_task |                  | 1.36 participant_id     |                  | 1.51 participant_id<br>0.01 current_task |                  |
| ICC                                                     | 0.53                                     |                  | 0.54                                     |                  | 0.29                    |                  | 0.32                                     |                  |
| N                                                       | 402 participant_id<br>18 current_task    |                  | 398 participant_id<br>18 current_task    |                  | 392 participant_id<br>* |                  | 397 participant_id<br>18 current_task    |                  |
| Observations                                            | 28944                                    |                  | 28656                                    |                  | 28224                   |                  | 28584                                    |                  |
| Marginal R <sup>2</sup> /<br>Conditional R <sup>2</sup> | 0.338 / 0.691                            |                  | 0.364 / 0.707                            |                  | 0.213 / 0.444           |                  | 0.360 / 0.562                            |                  |

*Note.* \* Random intercept for choice task was removed from the logistic regression model in South Africa due to a singular fit. The model converged after removing this random effect.

**Supplementary Table 5. Multilevel logistic regression results for EV adoption decisions including intervention x political orientation interaction by national context**

|                        | USA   |              |                  | UK    |              |                  | South Africa |            |                  | Mexico |              |                  |
|------------------------|-------|--------------|------------------|-------|--------------|------------------|--------------|------------|------------------|--------|--------------|------------------|
|                        | OR    | CI           | p                | OR    | CI           | p                | OR           | CI         | p                | OR     | CI           | p                |
| <b>Fixed effects</b>   |       |              |                  |       |              |                  |              |            |                  |        |              |                  |
| (Intercept)            | 0.19  | 0.12, 0.29   | <b>&lt;0.001</b> | 0.12  | 0.06, 0.24   | <b>&lt;0.001</b> | 0.92         | 0.71, 1.20 | 0.539            | 0.70   | 0.45, 1.07   | 0.100            |
| Car size [medium]      | 2.58  | 1.60, 4.17   | <b>&lt;0.001</b> | 4.29  | 2.18, 8.41   | <b>&lt;0.001</b> | 0.95         | 0.70, 1.27 | 0.717            | 1.37   | 0.90, 2.08   | 0.142            |
| Car size [small]       | 4.98  | 2.85, 8.71   | <b>&lt;0.001</b> | 3.79  | 1.90, 7.55   | <b>&lt;0.001</b> | 1.11         | 0.79, 1.56 | 0.559            | 1.52   | 0.98, 2.34   | 0.061            |
| Price [medium]         | 0.25  | 0.21, 0.29   | <b>&lt;0.001</b> | 0.22  | 0.17, 0.27   | <b>&lt;0.001</b> | 0.46         | 0.43, 0.50 | <b>&lt;0.001</b> | 0.22   | 0.20, 0.25   | <b>&lt;0.001</b> |
| Price [high]           | 0.07  | 0.06, 0.08   | <b>&lt;0.001</b> | 0.04  | 0.04, 0.06   | <b>&lt;0.001</b> | 0.21         | 0.19, 0.22 | <b>&lt;0.001</b> | 0.06   | 0.05, 0.06   | <b>&lt;0.001</b> |
| Savings [medium]       | 1.10  | 0.95, 1.27   | 0.216            | 1.23  | 0.99, 1.53   | 0.060            | 1.04         | 0.97, 1.12 | 0.243            | 1.11   | 0.98, 1.26   | <b>0.102</b>     |
| Savings [high]         | 1.04  | 0.90, 1.20   | 0.605            | 1.19  | 0.96, 1.47   | 0.113            | 1.19         | 1.11, 1.28 | <b>&lt;0.001</b> | 1.34   | 1.18, 1.51   | <b>&lt;0.001</b> |
| Range [medium]         | 6.52  | 5.62, 7.57   | <b>&lt;0.001</b> | 11.25 | 9.07, 13.96  | <b>&lt;0.001</b> | 3.36         | 3.14, 3.59 | <b>&lt;0.001</b> | 4.61   | 4.09, 5.21   | <b>&lt;0.001</b> |
| Range [high]           | 14.75 | 12.66, 17.18 | <b>&lt;0.001</b> | 30.71 | 24.64, 38.27 | <b>&lt;0.001</b> | 7.65         | 7.11, 8.24 | <b>&lt;0.001</b> | 12.88  | 11.34, 14.62 | <b>&lt;0.001</b> |
| Neighbourhood [medium] | 1.20  | 1.04, 1.39   | <b>0.015</b>     | 1.12  | 0.91, 1.39   | 0.286            | 1.35         | 1.26, 1.44 | <b>&lt;0.001</b> | 1.22   | 1.08, 1.37   | <b>0.001</b>     |
| Neighbourhood [high]   | 1.72  | 1.48, 2.00   | <b>&lt;0.001</b> | 1.35  | 1.09, 1.68   | <b>0.006</b>     | 1.63         | 1.52, 1.75 | <b>&lt;0.001</b> | 1.60   | 1.41, 1.81   | <b>&lt;0.001</b> |
| Emissions [medium]     | 0.92  | 0.80, 1.07   | 0.300            | 0.97  | 0.79, 1.21   | 0.813            | 0.68         | 0.63, 0.73 | <b>&lt;0.001</b> | 0.70   | 0.62, 0.80   | <b>&lt;0.001</b> |
| Emissions [high]       | 0.62  | 0.54, 0.72   | <b>&lt;0.001</b> | 0.62  | 0.50, 0.77   | <b>&lt;0.001</b> | 0.51         | 0.48, 0.55 | <b>&lt;0.001</b> | 0.46   | 0.41, 0.52   | <b>&lt;0.001</b> |
| Information [yes]      | 1.26  | 1.18, 1.34   | <b>&lt;0.001</b> | 1.15  | 1.08, 1.23   | <b>&lt;0.001</b> | 1.24         | 1.17, 1.31 | <b>&lt;0.001</b> | 1.37   | 1.29, 1.45   | <b>&lt;0.001</b> |
| Political orientation  | 0.64  | 0.52, 0.78   | <b>&lt;0.001</b> | 0.86  | 0.70, 1.06   | 0.162            | 1.00         | 0.88, 1.13 | 0.944            | 1.00   | 0.87, 1.14   | 0.990            |
| Carbon tax [low]       | 1.07  | 0.98, 1.16   | 0.127            | 1.00  | 0.92, 1.10   | 0.970            | 1.03         | 0.96, 1.10 | 0.462            | 1.09   | 1.01, 1.18   | <b>0.030</b>     |

|                                           | USA   |                |                  | UK    |                |                  | South Africa |                |                  | Mexico |                |                  |
|-------------------------------------------|-------|----------------|------------------|-------|----------------|------------------|--------------|----------------|------------------|--------|----------------|------------------|
|                                           | OR    | CI             | p                | OR    | CI             | p                | OR           | CI             | p                | OR     | CI             | p                |
| Carbon tax [high]                         | 1.48  | 1.36, 1.61     | <b>&lt;0.001</b> | 1.51  | 1.38, 1.66     | <b>&lt;0.001</b> | 1.24         | 1.16, 1.33     | <b>&lt;0.001</b> | 1.45   | 1.34, 1.57     | <b>&lt;0.001</b> |
| Age                                       | 0.62  | 0.52, 0.75     | <b>&lt;0.001</b> | 0.81  | 0.68, 0.97     | <b>0.024</b>     | 0.89         | 0.78, 1.02     | 0.103            | 0.89   | 0.75, 1.07     | 0.213            |
| Income                                    | 1.62  | 1.31, 1.99     | <b>&lt;0.001</b> | 1.27  | 1.01, 1.61     | <b>0.043</b>     | 1.00         | 0.90, 1.12     | 0.941            | 1.03   | 0.90, 1.18     | 0.638            |
| Information [yes] x Political orientation | 0.93  | 0.87, 0.99     | <b>0.024</b>     | 0.96  | 0.90, 1.03     | 0.274            | 0.96         | 0.90, 1.01     | 0.128            | 0.89   | 0.84, 0.95     | <b>&lt;0.001</b> |
| Carbon tax [low] x Political orientation  | 1.03  | 0.95, 1.11     | 0.500            | 0.98  | 0.90, 1.06     | 0.650            | 0.98         | 0.92, 1.05     | 0.647            | 0.99   | 0.92, 1.06     | 0.726            |
| Carbon tax [high] x Political orientation | 0.97  | 0.89, 1.05     | 0.422            | 0.96  | 0.89, 1.05     | 0.370            | 0.98         | 0.91, 1.05     | 0.518            | 1.01   | 0.94, 1.09     | 0.756            |
| <b>Random effects</b>                     |       |                |                  |       |                |                  |              |                |                  |        |                |                  |
| $\sigma^2$                                | 3.29  |                |                  | 3.29  |                |                  | 3.29         |                |                  | 3.29   |                |                  |
| $\tau_{00}$                               | 3.74  | participant_id |                  | 3.82  | participant_id |                  | 1.36         | participant_id |                  | 1.51   | participant_id |                  |
|                                           | 0.01  | current_task   |                  | 0.03  | current_task   |                  |              |                |                  | 0.01   | current_task   |                  |
| ICC                                       | 0.53  |                |                  | 0.54  |                |                  | 0.29         |                |                  | 0.32   |                |                  |
| N                                         | 402   | participant_id |                  | 398   | participant_id |                  | 392          | participant_id |                  | 397    | participant_id |                  |
|                                           | 18    | current_task   |                  | 18    | current_task   |                  | *            |                |                  | 18     | current_task   |                  |
| Observations                              | 28944 |                |                  | 28656 |                |                  | 28224        |                |                  | 28584  |                |                  |
| Marginal R <sup>2</sup>                   | 0.338 |                |                  | 0.364 |                |                  | 0.213        |                |                  | 0.360  |                |                  |
| Conditional R <sup>2</sup>                | 0.691 |                |                  | 0.707 |                |                  | 0.444        |                |                  | 0.562  |                |                  |

*Note.* \* Random intercept for choice task was removed from the regression model in South Africa due to a singular fit. The model converged after removing this random effect.



**Supplementary Table 6. Linear regression results on simulated EV adoption (from ABM) in 2030, 2040, 2050, by national context, showing the effects of a high carbon tax, information intervention and interaction of policies**

|                                | 2030     |              | 2040     |                | 2050     |                |
|--------------------------------|----------|--------------|----------|----------------|----------|----------------|
|                                | Estimate | CI           | Estimate | CI             | Estimate | CI             |
| Mexico                         |          |              |          |                |          |                |
| (Intercept)                    | 17.75    | 15.48, 20.02 | 161.50   | 157.83, 165.17 | 272.33   | 269.88, 274.79 |
| Information [yes]              | 13.75    | 10.54, 16.96 | 21.58    | 16.40, 26.77   | 17.33    | 13.86, 20.80   |
| Tax [high]                     | 9.83     | 6.63, 13.04  | 26.83    | 21.65, 32.02   | 22.08    | 18.61, 25.55   |
| Information [yes] × tax [high] | 2.83     | -1.70, 7.37  | 9.58     | 2.25, 16.92    | 0.08     | -4.82, 4.99    |
| South Africa                   |          |              |          |                |          |                |
| (Intercept)                    | 26.17    | 23.81, 28.52 | 172.67   | 169.09, 176.24 | 291.25   | 289.37, 293.13 |
| Information [yes]              | 8.33     | 5.00, 11.66  | 20.67    | 15.61, 25.73   | 9.92     | 7.26, 12.57    |
| Tax [high]                     | 5.83     | 2.50, 9.16   | 17.58    | 12.52, 22.64   | 7.00     | 4.35, 9.65     |
| Information [yes] × tax [high] | 11.33    | 6.62, 16.04  | 7.75     | 0.59, 14.91    | -1.58    | -5.33, 2.17    |
| USA                            |          |              |          |                |          |                |
| (Intercept)                    | 36.25    | 34.28, 38.22 | 164.08   | 160.88, 167.28 | 282.83   | 280.99, 284.68 |
| Information [yes]              | 4.17     | 1.39, 6.95   | 14.67    | 10.14, 19.19   | 10.17    | 7.56, 12.77    |
| Tax [high]                     | 10.00    | 7.22, 12.78  | 27.75    | 23.22, 32.28   | 15.33    | 12.73, 17.94   |
| Information [yes] × tax [high] | 7.92     | 3.99, 11.85  | 2.17     | -4.23, 8.57    | -3.08    | -6.77, 0.60    |
| UK                             |          |              |          |                |          |                |
| (Intercept)                    | 37.75    | 35.57, 39.93 | 169.92   | 166.35, 173.48 | 281.67   | 279.21, 284.12 |
| Information [yes]              | 3.83     | 0.75, 6.92   | 14.00    | 8.96, 19.04    | 11.92    | 8.45, 15.39    |
| Tax [high]                     | 10.92    | 7.83, 14.00  | 30.50    | 25.46, 35.54   | 23.08    | 19.61, 26.55   |
| Information [yes] × tax [high] | -4.25    | -8.61, 0.11  | -9.50    | -16.63, -2.37  | -5.25    | -10.16, -0.34  |

*Note.* The intercept reflects the baseline level of absolute EV adoption in the absence of any policy. Main effects represent the change in EV adoption when the respective policy is implemented alone, relative to the baseline. The interaction effect reflects the additional change in EV adoption when the two policies are implemented together, beyond the sum of their individual main effects.

**Supplementary Table 7. Linear regression results on simulated EV adoption (from ABM) in 2030, 2040, 2050, by national context, showing the effects of a low carbon tax, information intervention and interaction of policies**

|                               | 2030     |              | 2040     |                | 2050     |                |
|-------------------------------|----------|--------------|----------|----------------|----------|----------------|
|                               | Estimate | CI           | Estimate | CI             | Estimate | CI             |
| <b>Mexico</b>                 |          |              |          |                |          |                |
| (Intercept)                   | 17.75    | 15.44, 20.06 | 161.50   | 157.79, 165.21 | 272.33   | 270.17, 274.50 |
| Information [yes]             | 13.75    | 10.49, 17.01 | 21.58    | 16.34, 26.82   | 17.33    | 14.27, 20.40   |
| Tax [low]                     | 1.92     | -1.35, 5.18  | 8.92     | 3.68, 14.16    | 5.92     | 2.85, 8.98     |
| Information [yes] × tax [low] | 0.75     | -3.86, 5.36  | -0.75    | -8.16, 6.66    | -1.25    | -5.58, 3.08    |
| <b>South Africa</b>           |          |              |          |                |          |                |
| (Intercept)                   | 26.17    | 24.01, 28.32 | 172.67   | 168.83, 176.50 | 291.25   | 288.94, 293.56 |
| Information [yes]             | 8.33     | 5.29, 11.38  | 20.67    | 15.24, 26.09   | 9.92     | 6.66, 13.18    |
| Tax [low]                     | 1.17     | -1.88, 4.21  | -1.50    | -6.93, 3.93    | -5.08    | -8.34, -1.82   |
| Information [yes] × tax [low] | -0.92    | -5.23, 3.39  | 9.75     | 2.08, 17.42    | -1.25    | -5.86, 3.36    |
| <b>USA</b>                    |          |              |          |                |          |                |
| (Intercept)                   | 36.25    | 34.23, 38.27 | 164.08   | 160.66, 167.51 | 282.83   | 281.07, 284.60 |
| Information [yes]             | 4.17     | 1.32, 7.02   | 14.67    | 9.82, 19.51    | 10.17    | 7.67, 12.66    |
| Tax [low]                     | 0.08     | -2.77, 2.93  | 8.08     | 3.24, 12.93    | 3.75     | 1.26, 6.24     |
| Information [yes] × tax [low] | 2.75     | -1.28, 6.78  | -5.67    | -12.52, 1.19   | -4.92    | -8.44, -1.39   |
| <b>UK</b>                     |          |              |          |                |          |                |
| (Intercept)                   | 37.75    | 35.54, 39.96 | 169.92   | 166.73, 173.10 | 281.67   | 278.71, 284.62 |
| Information [yes]             | 3.83     | 0.71, 6.96   | 14.00    | 9.49, 18.51    | 11.92    | 7.74, 16.10    |
| Tax [low]                     | 1.67     | -1.46, 4.79  | -2.17    | -6.67, 2.34    | 7.17     | 2.99, 11.35    |
| Information [yes] × tax [low] | -3.08    | -7.50, 1.33  | -3.83    | -10.21, 2.54   | -8.25    | -14.16, -2.34  |

*Note.* The intercept reflects the baseline level of EV adoption in the absence of any policy. Main effects represent the change in EV adoption when the respective policy is implemented alone, relative to the baseline. The interaction effect reflects the additional change in EV adoption when the two policies are implemented together, beyond the sum of their individual main effects.

**Supplementary Table 8. Multilevel logistic regression results for policy support including additional policy attributes and covariates**

|                                                      | Policy support |            |                  |
|------------------------------------------------------|----------------|------------|------------------|
|                                                      | OR             | CI         | p                |
| <b>Fixed effects</b>                                 |                |            |                  |
| (Intercept)                                          | 0.52           | 0.46, 0.59 |                  |
| Carbon tax [low]                                     | 0.38           | 0.36, 0.41 | <b>&lt;0.001</b> |
| Carbon tax [high]                                    | 0.17           | 0.16, 0.18 | <b>&lt;0.001</b> |
| Climate label [voluntary]                            | 1.36           | 1.27, 1.45 | <b>&lt;0.001</b> |
| Climate label [mandatory]                            | 1.65           | 1.54, 1.76 | <b>&lt;0.001</b> |
| Subsidy [medium]                                     | 3.12           | 2.91, 3.34 | <b>&lt;0.001</b> |
| Subsidy [high]                                       | 4.53           | 4.23, 4.86 | <b>&lt;0.001</b> |
| Neighbourhood [medium]                               | 1.34           | 1.26, 1.44 | <b>&lt;0.001</b> |
| Neighbourhood [high]                                 | 1.49           | 1.39, 1.59 | <b>&lt;0.001</b> |
| Age                                                  | 0.86           | 0.82, 0.91 | <b>&lt;0.001</b> |
| Income                                               | 1.06           | 1.01, 1.12 | <b>0.019</b>     |
| <b>Random effects</b>                                |                |            |                  |
| $\sigma^2$                                           | 3.29           |            |                  |
| $\tau_{00}$ participant_id                           | 0.72           |            |                  |
| $\tau_{00}$ country                                  | 0.01           |            |                  |
| ICC                                                  | 0.18           |            |                  |
| N participant_id                                     | 1589           |            |                  |
| N country                                            | 4              |            |                  |
| Observations                                         | 28602          |            |                  |
| Marginal R <sup>2</sup> / Conditional R <sup>2</sup> | 0.205 / 0.349  |            |                  |

**Supplementary Table 9. Multilevel logistic regression results for policy support by national context**

|                                                      | USA           |                |                  | UK            |                |                  | Mexico        |                |                  | South Africa  |                |                  |
|------------------------------------------------------|---------------|----------------|------------------|---------------|----------------|------------------|---------------|----------------|------------------|---------------|----------------|------------------|
|                                                      | OR            | CI             | <i>p</i>         |
| <b>Fixed effects</b>                                 |               |                |                  |               |                |                  |               |                |                  |               |                |                  |
| (Intercept)                                          | 0.67          | 0.55, 0.81     |                  | 0.44          | 0.36, 0.53     |                  | 0.45          | 0.37, 0.54     |                  | 0.62          | 0.52, 0.74     |                  |
| Carbon tax [low]                                     | 0.28          | 0.25, 0.32     | <b>&lt;0.001</b> | 0.35          | 0.30, 0.40     | <b>&lt;0.001</b> | 0.49          | 0.43, 0.55     | <b>&lt;0.001</b> | 0.43          | 0.38, 0.49     | <b>&lt;0.001</b> |
| Carbon tax [high]                                    | 0.14          | 0.12, 0.16     | <b>&lt;0.001</b> | 0.15          | 0.13, 0.18     | <b>&lt;0.001</b> | 0.22          | 0.20, 0.26     | <b>&lt;0.001</b> | 0.16          | 0.14, 0.19     | <b>&lt;0.001</b> |
| Climate label [voluntary]                            | 1.22          | 1.07, 1.40     | <b>0.003</b>     | 1.24          | 1.08, 1.42     | <b>0.002</b>     | 1.55          | 1.36, 1.76     | <b>&lt;0.001</b> | 1.44          | 1.26, 1.64     | <b>&lt;0.001</b> |
| Climate label [mandatory]                            | 1.47          | 1.28, 1.68     | <b>&lt;0.001</b> | 1.45          | 1.26, 1.66     | <b>&lt;0.001</b> | 2.29          | 2.01, 2.61     | <b>&lt;0.001</b> | 1.48          | 1.30, 1.69     | <b>&lt;0.001</b> |
| Subsidy [low]                                        | 2.99          | 2.60, 3.43     | <b>&lt;0.001</b> | 3.98          | 3.45, 4.58     | <b>&lt;0.001</b> | 2.73          | 2.40, 3.10     | <b>&lt;0.001</b> | 3.09          | 2.71, 3.53     | <b>&lt;0.001</b> |
| Subsidy [high]                                       | 4.14          | 3.59, 4.77     | <b>&lt;0.001</b> | 7.39          | 6.38, 8.57     | <b>&lt;0.001</b> | 3.16          | 2.77, 3.60     | <b>&lt;0.001</b> | 4.71          | 4.11, 5.41     | <b>&lt;0.001</b> |
| Neighbourhood [medium]                               | 1.33          | 1.16, 1.52     | <b>&lt;0.001</b> | 1.38          | 1.21, 1.58     | <b>&lt;0.001</b> | 1.39          | 1.22, 1.58     | <b>&lt;0.001</b> | 1.29          | 1.13, 1.47     | <b>&lt;0.001</b> |
| Neighbourhood [high]                                 | 1.36          | 1.19, 1.56     | <b>&lt;0.001</b> | 1.52          | 1.33, 1.75     | <b>&lt;0.001</b> | 1.59          | 1.40, 1.81     | <b>&lt;0.001</b> | 1.51          | 1.32, 1.72     | <b>&lt;0.001</b> |
| Age                                                  | 0.79          | 0.71, 0.88     | <b>&lt;0.001</b> | 0.87          | 0.79, 0.96     | <b>0.005</b>     | 0.99          | 0.87, 1.11     | 0.817            | 0.87          | 0.78, 0.98     | <b>0.016</b>     |
| Income                                               | 1.12          | 0.99, 1.26     | 0.072            | 1.13          | 1.00, 1.28     | 0.051            | 1.02          | 0.94, 1.12     | 0.606            | 1.00          | 0.92, 1.09     | 0.996            |
| <b>Random Effects</b>                                |               |                |                  |               |                |                  |               |                |                  |               |                |                  |
| $\sigma^2$                                           | 3.29          |                |                  | 3.29          |                |                  | 3.29          |                |                  | 3.29          |                |                  |
| $\tau_{00}$                                          | 1.04          | participant_id |                  | 0.81          | participant_id |                  | 0.47          | participant_id |                  | 0.62          | participant_id |                  |
| ICC                                                  | 0.24          |                |                  | 0.20          |                |                  | 0.12          |                |                  | 0.16          |                |                  |
| N                                                    | 402           | participant_id |                  | 398           | participant_id |                  | 397           | participant_id |                  | 392           | participant_id |                  |
| Observations                                         | 7236          |                |                  | 7164          |                |                  | 7146          |                |                  | 7056          |                |                  |
| Marginal R <sup>2</sup> / Conditional R <sup>2</sup> | 0.210 / 0.400 |                |                  | 0.252 / 0.400 |                |                  | 0.173 / 0.277 |                |                  | 0.212 / 0.337 |                |                  |

**Supplementary Table 10. Multilevel logistic regression results for policy support including the three-way-interaction between tax x climate impact label x political orientation by national context**

|                                    | USA  |            |                  | UK   |            |                  | Mexico |            |                  | South Africa |            |                  |
|------------------------------------|------|------------|------------------|------|------------|------------------|--------|------------|------------------|--------------|------------|------------------|
|                                    | OR   | CI         | p                | OR   | CI         | p                | OR     | CI         | p                | OR           | CI         | p                |
| <b>Fixed effects</b>               |      |            |                  |      |            |                  |        |            |                  |              |            |                  |
| (Intercept)                        | 0.64 | 0.52, 0.79 |                  | 0.45 | 0.37, 0.56 |                  | 0.43   | 0.35, 0.53 |                  | 0.62         | 0.51, 0.75 |                  |
| Carbon tax [low]                   | 0.29 | 0.22, 0.38 | <b>&lt;0.001</b> | 0.33 | 0.25, 0.44 | <b>&lt;0.001</b> | 0.46   | 0.35, 0.59 | <b>&lt;0.001</b> | 0.45         | 0.34, 0.58 | <b>&lt;0.001</b> |
| Carbon tax [high]                  | 0.16 | 0.12, 0.21 | <b>&lt;0.001</b> | 0.12 | 0.09, 0.16 | <b>&lt;0.001</b> | 0.25   | 0.19, 0.32 | <b>&lt;0.001</b> | 0.17         | 0.13, 0.22 | <b>&lt;0.001</b> |
| Climate label [voluntary]          | 1.26 | 0.96, 1.65 | 0.094            | 1.05 | 0.80, 1.38 | 0.733            | 1.37   | 1.06, 1.78 | <b>0.017</b>     | 1.44         | 1.09, 1.89 | <b>0.009</b>     |
| Climate label [mandatory]          | 1.77 | 1.34, 2.32 | <b>&lt;0.001</b> | 1.40 | 1.07, 1.85 | <b>0.015</b>     | 2.84   | 2.18, 3.70 | <b>&lt;0.001</b> | 1.64         | 1.25, 2.15 | <b>&lt;0.001</b> |
| Political orientation              | 1.23 | 1.01, 1.49 | <b>0.035</b>     | 1.20 | 0.99, 1.44 | 0.057            | 1.26   | 1.06, 1.49 | <b>0.009</b>     | 1.04         | 0.87, 1.24 | 0.690            |
| Subsidy [low]                      | 2.80 | 2.35, 3.34 | <b>&lt;0.001</b> | 4.05 | 3.38, 4.85 | <b>&lt;0.001</b> | 2.41   | 2.05, 2.84 | <b>&lt;0.001</b> | 3.02         | 2.56, 3.57 | <b>&lt;0.001</b> |
| Subsidy [high]                     | 3.91 | 3.30, 4.64 | <b>&lt;0.001</b> | 7.90 | 6.61, 9.44 | <b>&lt;0.001</b> | 3.02   | 2.58, 3.54 | <b>&lt;0.001</b> | 4.52         | 3.83, 5.33 | <b>&lt;0.001</b> |
| Neighbourhood [medium]             | 1.34 | 1.13, 1.59 | <b>0.001</b>     | 1.46 | 1.23, 1.74 | <b>&lt;0.001</b> | 1.50   | 1.28, 1.78 | <b>&lt;0.001</b> | 1.27         | 1.07, 1.51 | <b>0.005</b>     |
| Neighbourhood [high]               | 1.47 | 1.24, 1.76 | <b>&lt;0.001</b> | 1.52 | 1.27, 1.82 | <b>&lt;0.001</b> | 1.82   | 1.54, 2.13 | <b>&lt;0.001</b> | 1.54         | 1.30, 1.82 | <b>&lt;0.001</b> |
| Age                                | 0.80 | 0.72, 0.89 | <b>&lt;0.001</b> | 0.88 | 0.80, 0.97 | <b>0.013</b>     | 0.99   | 0.88, 1.12 | 0.881            | 0.87         | 0.78, 0.97 | <b>0.014</b>     |
| Income                             | 1.14 | 1.01, 1.29 | <b>0.034</b>     | 1.17 | 1.03, 1.32 | <b>0.013</b>     | 1.03   | 0.94, 1.12 | 0.596            | 1.00         | 0.92, 1.09 | 0.999            |
| Tax [low] × label [voluntary]      | 1.05 | 0.69, 1.58 | 0.828            | 1.10 | 0.72, 1.67 | 0.658            | 1.33   | 0.90, 1.96 | 0.155            | 1.04         | 0.69, 1.56 | 0.846            |
| Tax [high] × label [voluntary]     | 0.88 | 0.58, 1.33 | 0.533            | 1.55 | 1.02, 2.37 | 0.042            | 1.08   | 0.73, 1.61 | 0.697            | 0.96         | 0.64, 1.44 | 0.830            |
| Tax [low] × Label [mandatory]      | 0.81 | 0.54, 1.22 | 0.313            | 0.96 | 0.64, 1.46 | 0.855            | 0.87   | 0.59, 1.29 | 0.487            | 0.84         | 0.56, 1.24 | 0.380            |
| Tax [high] × label [mandatory]     | 0.70 | 0.46, 1.07 | 0.097            | 1.16 | 0.76, 1.77 | 0.497            | 0.63   | 0.43, 0.94 | <b>0.023</b>     | 0.90         | 0.60, 1.35 | 0.604            |
| Tax [low] × political orientation  | 0.61 | 0.48, 0.77 | <b>&lt;0.001</b> | 0.56 | 0.44, 0.71 | <b>&lt;0.001</b> | 0.73   | 0.59, 0.91 | <b>0.005</b>     | 1.04         | 0.84, 1.30 | 0.708            |
| Tax [high] × political orientation | 0.59 | 0.47, 0.75 | <b>&lt;0.001</b> | 0.66 | 0.52, 0.83 | <b>&lt;0.001</b> | 0.65   | 0.51, 0.81 | <b>&lt;0.001</b> | 0.93         | 0.75, 1.17 | 0.540            |

|                                                      | USA           |                |                  | UK            |                |              | Mexico        |                |       | South Africa  |                |              |
|------------------------------------------------------|---------------|----------------|------------------|---------------|----------------|--------------|---------------|----------------|-------|---------------|----------------|--------------|
|                                                      | OR            | CI             | p                | OR            | CI             | p            | OR            | CI             | p     | OR            | CI             | p            |
| Label                                                | 0.97          | 0.77, 1.22     | 0.798            | 1.06          | 0.84, 1.34     | 0.640        | 0.92          | 0.74, 1.15     | 0.472 | 0.95          | 0.75, 1.20     | 0.684        |
| [voluntary] × political orientation                  |               |                |                  |               |                |              |               |                |       |               |                |              |
| Label                                                | 0.63          | 0.49, 0.80     | <b>&lt;0.001</b> | 0.72          | 0.56, 0.92     | <b>0.008</b> | 1.00          | 0.79, 1.27     | 0.990 | 0.71          | 0.56, 0.91     | <b>0.006</b> |
| [mandatory] × political orientation                  |               |                |                  |               |                |              |               |                |       |               |                |              |
| (Tax [low] × label                                   | 0.86          | 0.62, 1.20     | 0.378            | 1.07          | 0.77, 1.49     | 0.691        | 1.04          | 0.76, 1.41     | 0.805 | 0.90          | 0.65, 1.23     | 0.500        |
| [voluntary]) × political orientation                 |               |                |                  |               |                |              |               |                |       |               |                |              |
| (Tax [high] × label                                  | 1.18          | 0.84, 1.66     | 0.335            | 0.87          | 0.62, 1.22     | 0.415        | 1.10          | 0.79, 1.52     | 0.568 | 1.17          | 0.84, 1.62     | 0.346        |
| [voluntary]) × Political orientation                 |               |                |                  |               |                |              |               |                |       |               |                |              |
| (Tax [low] × label                                   | 1.40          | 1.00, 1.97     | 0.050            | 1.40          | 1.00, 1.97     | 0.053        | 0.90          | 0.65, 1.24     | 0.517 | 1.29          | 0.93, 1.79     | 0.131        |
| [mandatory]) × political orientation                 |               |                |                  |               |                |              |               |                |       |               |                |              |
| (Tax [high] × label                                  | 1.74          | 1.23, 2.44     | <b>0.002</b>     | 1.31          | 0.93, 1.85     | 0.119        | 1.08          | 0.78, 1.51     | 0.641 | 1.42          | 1.01, 1.98     | <b>0.041</b> |
| [mandatory]) × political orientation                 |               |                |                  |               |                |              |               |                |       |               |                |              |
| <b>Random effects</b>                                |               |                |                  |               |                |              |               |                |       |               |                |              |
| $\sigma^2$                                           | 3.29          |                |                  | 3.29          |                |              | 3.29          |                |       | 3.29          |                |              |
| $\tau_{00}$                                          | 1.05          | participant_id |                  | 0.81          | participant_id |              | 0.48          | participant_id |       | 0.62          | participant_id |              |
| ICC                                                  | 0.24          |                |                  | 0.20          |                |              | 0.13          |                |       | 0.16          |                |              |
| N                                                    | 402           | participant_id |                  | 398           | participant_id |              | 397           | participant_id |       | 392           | participant_id |              |
| Observations                                         | 7236          |                |                  | 7164          |                |              | 7146          |                |       | 7056          |                |              |
| Marginal R <sup>2</sup> / Conditional R <sup>2</sup> | 0.227 / 0.413 |                |                  | 0.267 / 0.411 |                |              | 0.183 / 0.287 |                |       | 0.215 / 0.340 |                |              |

**Supplementary Table 11. Sample characteristics compared to national benchmarks**

| Variable                                       | Our sample            | National distribution                 | Source             |
|------------------------------------------------|-----------------------|---------------------------------------|--------------------|
| <b>Mexico (N=397)</b>                          |                       |                                       |                    |
| Age (median)                                   | 34                    | 29                                    | ref. <sup>2</sup>  |
| Gender (female in %)                           | 44.8                  | 51.2                                  | ref. <sup>2</sup>  |
| Median disposable household income in \$MXN    | 120,001 to 400,000    | 171,330 (per capita household income) | ref. <sup>3</sup>  |
| Education (low / medium / high education in %) | 1.62 / 21.02 / 77.36  | 56.22 / 23.15 / 20.64                 | ref. <sup>4</sup>  |
| <b>South Africa (N=392)</b>                    |                       |                                       |                    |
| Age (median)                                   | 37                    | 28                                    | ref. <sup>5</sup>  |
| Gender (female in %)                           | 51.0                  | 51.1                                  | ref. <sup>6</sup>  |
| Median disposable household income in R        | 60,001 to 130,000     | 95,770                                | ref. <sup>3</sup>  |
| Education (low / medium / high education in %) | 2.48 / 27.33 / 70.19  | 54.73 / 31.35 / 13.91                 | ref. <sup>4</sup>  |
| <b>United States (N=402)</b>                   |                       |                                       |                    |
| Age (median)                                   | 45                    | 39.2                                  | ref. <sup>7</sup>  |
| Gender (female in %)                           | 48.5                  | 50.5                                  | ref. <sup>8</sup>  |
| Median disposable household income in \$       | 55,001 to 90,000      | 74,580                                | ref. <sup>9</sup>  |
| Education (low / medium / high education in %) | 0.6 / 30.24 / 69.16   | 8.16 / 41.82 / 50.32                  | ref. <sup>4</sup>  |
| <b>United Kingdom (N=398)</b>                  |                       |                                       |                    |
| Age (median)                                   | 44                    | 40.7                                  | ref. <sup>10</sup> |
| Gender (female in %)                           | 49.0                  | 51.0                                  | ref. <sup>11</sup> |
| Median disposable household income in £        | 15,001 to 30,000      | 36,663                                | ref. <sup>12</sup> |
| Education (low / medium / high education in %) | 18.02 / 16.22 / 65.77 | 18.56 / 30.12 / 51.32                 | ref. <sup>4</sup>  |

**Supplementary Table 12. Attributes and levels of the EV choice experiment by country**

| Country      | Car size | Attribute                    | Attribute levels              | Reference                        |
|--------------|----------|------------------------------|-------------------------------|----------------------------------|
| Mexico       | Small    | Investment costs             | 155; 223; 291 k MXN           | ref. <sup>13</sup>               |
|              |          | Savings on driving           | 155; 170; 185 \$MXN / 100km   | Own calculation (see table note) |
|              |          | Lifecycle GHG emissions      | 15; 25; 35 tCO <sub>2</sub> e | ref. <sup>1</sup>                |
|              |          | Battery range                | 240; 420; 600 km              | refs. <sup>14–16</sup>           |
|              |          | EV adopters in neighbourhood | 8; 40; 72 %                   | Own scenario                     |
|              | Medium   | Investment costs             | 261; 350; 436 k \$MXN         | ref. <sup>13</sup>               |
|              |          | Savings on driving           | 175; 195; 215 \$MXN / 100km   | Own calculation (see table note) |
|              |          | Lifecycle GHG emissions      | 15; 25; 35 tCO <sub>2</sub> e | ref. <sup>1</sup>                |
|              |          | Battery range                | 300; 480; 660 km              | refs. <sup>14–16</sup>           |
|              |          | EV adopters in neighbourhood | 8; 40; 72 %                   | Own scenario                     |
|              | Large    | Investment costs             | 688; 805; 950 k \$MXN         | ref. <sup>13</sup>               |
|              |          | Savings on driving           | 205; 225; 245 \$MXN / 100km   | Own calculation (see table note) |
|              |          | Lifecycle GHG emissions      | 15; 25; 35 tCO <sub>2</sub> e | ref. <sup>1</sup>                |
|              |          | Battery range                | 370; 550; 730 km              | refs. <sup>14–16</sup>           |
|              |          | EV adopters in neighbourhood | 8; 40; 72 %                   | Own scenario                     |
| South Africa | Small    | Investment costs             | 112; 161; 210 k R             | ref. <sup>17</sup>               |
|              |          | Savings on driving           | 130; 145; 160 R / 100km       | Own calculation (see table note) |
|              |          | Lifecycle GHG emissions      | 15; 40; 50 tCO <sub>2</sub> e | ref. <sup>1</sup>                |
|              |          | Battery range                | 240; 420; 600 km              | refs. <sup>14–16</sup>           |
|              |          | EV adopters in neighbourhood | 8; 40; 72 %                   | Own scenario                     |
|              | Medium   | Investment costs             | 189; 252; 315 k R             | ref. <sup>17</sup>               |
|              |          | Savings on driving           | 150; 165; 180 R / 100km       | Own calculation (see table note) |
|              |          | Lifecycle GHG emissions      | 15; 40; 50 tCO <sub>2</sub> e | ref. <sup>1</sup>                |
|              |          | Battery range                | 300; 480; 660 km              | refs. <sup>14–16</sup>           |
|              |          | EV adopters in neighbourhood | 8; 40; 72 %                   | Own scenario                     |
|              | Large    | Investment costs             | 497; 581; 686 k R             | ref. <sup>17</sup>               |
|              |          | Savings on driving           | 175; 195; 215 R / 100km       | Own calculation (see table note) |
|              |          | Lifecycle GHG emissions      | 15; 40; 50 tCO <sub>2</sub> e | ref. <sup>1</sup>                |
|              |          | Battery range                | 370; 550; 730 km              | refs. <sup>14–16</sup>           |
|              |          | EV adopters in neighbourhood | 8; 40; 72 %                   | Own scenario                     |
| USA          | Small    | Investment costs             | 16; 23; 30 k \$               | ref. <sup>18</sup>               |
|              |          | Savings on driving           | 6.7; 7.4; 8.1 \$ / 100 miles  | Own calculation (see table note) |
|              |          | Lifecycle GHG emissions      | 11; 19; 30 tCO <sub>2</sub> e | ref. <sup>1</sup>                |



| Country | Car size | Attribute                    | Attribute levels               | Reference                        |
|---------|----------|------------------------------|--------------------------------|----------------------------------|
|         | Medium   | Battery range                | 150; 260; 370 miles            | refs. <sup>14–16</sup>           |
|         |          | EV adopters in neighbourhood | 8; 40; 72 %                    | Own scenario                     |
|         |          | Investment costs             | 27; 36; 45 k \$                | ref. <sup>18</sup>               |
|         |          | Savings on driving           | 7.2; 8; 8.8 \$ / 100 miles     | Own calculation (see table note) |
|         |          | Lifecycle GHG emissions      | 11; 19; 30 tCO <sub>2</sub> e  | ref. <sup>1</sup>                |
|         | Large    | Battery range                | 190; 300; 410 miles            | refs. <sup>14–16</sup>           |
|         |          | EV adopters in neighbourhood | 8; 40; 72 %                    | Own scenario                     |
|         |          | Investment costs             | 71; 83; 98 k \$                | ref. <sup>18</sup>               |
|         |          | Savings on driving           | 8.7; 9.6; 10.5 \$ / 100 miles  | Own calculation (see table note) |
|         |          | Lifecycle GHG emissions      | 11; 19; 30 tCO <sub>2</sub> e  | ref. <sup>1</sup>                |
| UK      | Small    | Battery range                | 230; 340; 450 miles            | refs. <sup>14–16</sup>           |
|         |          | EV adopters in neighbourhood | 8; 40; 72 %                    | Own scenario                     |
|         |          | Investment costs             | 11.2; 16; 21 k £               | ref. <sup>19</sup>               |
|         |          | Savings on driving           | 9.9; 10.8; 11.7 £ / 100 miles  | Own calculation (see table note) |
|         |          | Lifecycle GHG emissions      | 13; 19; 30 tCO <sub>2</sub> e  | ref. <sup>1</sup>                |
|         | Medium   | Battery range                | 150; 260; 370 miles            | refs. <sup>14–16</sup>           |
|         |          | EV adopters in neighbourhood | 8; 40; 72 %                    | Own scenario                     |
|         |          | Investment costs             | 18.9; 25.2; 31.5 k £           | ref. <sup>19</sup>               |
|         |          | Savings on driving           | 11.5; 12.8; 14.1 £ / 100 miles | Own calculation (see table note) |
|         |          | Lifecycle GHG emissions      | 13; 19; 30 tCO <sub>2</sub> e  | ref. <sup>1</sup>                |
|         | Large    | Battery range                | 190; 300; 410 miles            | refs. <sup>14–16</sup>           |
|         |          | EV adopters in neighbourhood | 8; 40; 72 %                    | Own scenario                     |
|         |          | Investment costs             | 49.7; 58; 68 k £               | ref. <sup>19</sup>               |
|         |          | Savings on driving           | 13.8; 15.4; 17 £ / 100 miles   | Own calculation (see table note) |
|         |          | Lifecycle GHG emissions      | 13; 19; 30 tCO <sub>2</sub> e  | ref. <sup>1</sup>                |
|         |          | Battery range                | 230; 340; 450 miles            | refs. <sup>14–16</sup>           |
|         |          | EV adopters in neighbourhood | 8; 40; 72 %                    | Own scenario                     |

**Note.** \*Savings of driving an EV compared to an ICEV for 100 km (miles) were calculated as follows: (ICEV fuel consumption [litre/100 km (miles)] \* price of gasoline [local currency/litre]) - (EV fuel consumption [kWh/100 km (miles)] \* price of electricity [local currency/kWh]). Local gasoline and electricity prices at the time of data collection were used as baseline values. Energy consumption depended on car size and type: small car (7.35 litre or 16 kWh), medium (8.4 litre or 19 kWh), large (9.8 litre or 22 kWh)<sup>20,21</sup>.

**Supplementary Table 13. Attributes and levels of the policy support experiment by country**

| <b>Country</b> | <b>Attribute</b>           | <b>Attribute levels</b>         | <b>Reference</b>   |
|----------------|----------------------------|---------------------------------|--------------------|
| Mexico         | Carbon tax on gasoline     | no tax; 550; 2200 \$MXN         | ref. <sup>22</sup> |
|                | Climate impact label       | no label; voluntary; mandatory  | Own scenario       |
|                | Subsidy on investment cost | no subsidy; 24.25; 48.5 k \$MXN | ref. <sup>16</sup> |
|                | Adopters in neighbourhood  | 11; 47; 83 %                    | Own scenario       |
| South Africa   | Carbon tax on gasoline     | no tax; 400; 1600 R             | ref. <sup>22</sup> |
|                | Climate impact label       | no label; voluntary; mandatory  | Own scenario       |
|                | Subsidy on investment cost | no subsidy; 17.5; 35 k R        | ref. <sup>16</sup> |
|                | Adopters in neighbourhood  | 11; 47; 83 %                    | Own scenario       |
| USA            | Carbon tax on gasoline     | no tax; 60; 240 \$              | ref. <sup>22</sup> |
|                | Climate impact label       | no label; voluntary; mandatory  | Own scenario       |
|                | Subsidy on investment cost | no subsidy; 2.5; 5 k \$         | ref. <sup>16</sup> |
|                | Adopters in neighbourhood  | 11; 47; 83 %                    | Own scenario       |
| UK             | Carbon tax on gasoline     | no tax; 40; 160 £               | ref. <sup>22</sup> |
|                | Climate impact label       | no label; voluntary; mandatory  | Own scenario       |
|                | Subsidy on investment cost | no subsidy; 1.75; 3.5 k £       | ref. <sup>16</sup> |
|                | Adopters in neighbourhood  | 11; 47; 83 %                    | Own scenario       |

**Supplementary Table 14. Preregistered hypotheses and corresponding manuscript hypotheses numbering**

| <b>Manuscript numbering</b>      | <b>Preregistered hypothesis</b>  | <b>Expected effect</b>                                                                                        | <b>Deviation from preregistration</b>                                                  |
|----------------------------------|----------------------------------|---------------------------------------------------------------------------------------------------------------|----------------------------------------------------------------------------------------|
| Hypothesis 1                     | Hypothesis 5                     | Main effect of tax on attention to savings                                                                    | -                                                                                      |
| Hypothesis 2                     | Hypothesis 6                     | Main effect of information intervention on attention to emissions                                             | -                                                                                      |
| Hypothesis 3                     | Hypothesis 7                     | Negative interaction effect between tax and information on attention to savings                               | -                                                                                      |
| Hypothesis 4                     | Hypothesis 8                     | Negative interaction effect between tax and label on attention to emissions                                   | -                                                                                      |
| Hypothesis 5                     | Hypothesis 1                     | Main effect of tax on EV choice                                                                               | -                                                                                      |
| Hypothesis 6                     | Hypothesis 2                     | Main effect of attribute translation on EV choice                                                             | -                                                                                      |
| Hypothesis 7a<br>Hypothesis 7b   | Hypothesis 3a<br>Hypothesis 3b   | a) Main effect of political orientation<br>b) interaction of political orientation with tax on EV choice      | Additionally tested interaction of political orientation and information intervention  |
| Hypothesis 8a<br>Hypothesis 8b   | Hypothesis 4a<br>Hypothesis 4b   | a) Main effect of country on EV choice<br>b) interaction of country with tax and information intervention     | -                                                                                      |
| Hypothesis 9                     | Hypothesis 12                    | Main effect of tax on policy support                                                                          | -                                                                                      |
| Hypothesis 10                    | Hypothesis 11                    | Main effect of climate information label on policy support                                                    | -                                                                                      |
| Hypothesis 11a<br>Hypothesis 11b | Hypothesis 13a<br>Hypothesis 13b | a) Main effect political orientation<br>b) interaction political orientation and carbon tax on policy support | Additionally tested interaction of political orientation and climate information label |
| Hypothesis 12a                   | Hypothesis 14a                   | a) Interaction tax and climate information label on policy support                                            | -                                                                                      |
| Hypothesis 12b                   | Hypothesis 14b                   | b) three-way-interaction with political orientation                                                           |                                                                                        |
| Hypothesis 13a<br>Hypothesis 13b | Hypothesis 15a<br>Hypothesis 15b | a) Main effect of country and b)<br>interaction of country with interventions on policy support               | -                                                                                      |

| <b>Manuscript numbering</b> | <b>Preregistered hypothesis</b> | <b>Expected effect</b>                                                                                                         | <b>Deviation from preregistration</b>                                                 |
|-----------------------------|---------------------------------|--------------------------------------------------------------------------------------------------------------------------------|---------------------------------------------------------------------------------------|
| -                           | Hypothesis 9a                   | a) Main effect of political orientation on total attribute acquisitions and                                                    | Reported in the supplementary material, not in the main text (Supplementary Figure 1) |
|                             | Hypothesis 9b                   | b) main effect on attention to emissions                                                                                       |                                                                                       |
| -                           | Hypothesis 10a                  | a) Higher decision threshold for yes-decisions in information intervention conditions compared to without the intervention and | Not reported here                                                                     |
|                             | Hypothesis 10b                  | b) interaction with political orientation on decision threshold.                                                               |                                                                                       |

**Supplementary Table 15. Sensitivity analysis: Multilevel regression results for attention allocation excluding trials with a response time above a cut-off value of three median absolute deviations above the median, as preregistered**

|                                | Frequency of savings |                  | Likelihood of viewing savings first |              | Frequency emissions  |                  | Likelihood of viewing emissions first |                  |
|--------------------------------|----------------------|------------------|-------------------------------------|--------------|----------------------|------------------|---------------------------------------|------------------|
|                                | <i>b</i> [CI]        | <i>p</i>         | OR [CI]                             | <i>p</i>     | <i>b</i> [CI]        | <i>p</i>         | OR [CI]                               | <i>p</i>         |
| <b>Fixed effects</b>           |                      |                  |                                     |              |                      |                  |                                       |                  |
| Intercept                      | 17.00 [16.02, 17.97] |                  | 0.19 [0.18, 0.21]                   |              | 16.87 [15.22, 18.52] |                  | 0.18 [0.16, 0.20]                     |                  |
| Car size [medium]              | 0.70 [-0.18, 1.58]   | 0.118            | 1.05 [0.97, 1.13]                   | 0.230        | 0.10 [-0.84, 1.04]   | 0.832            | 1.04 [0.96, 1.13]                     | 0.317            |
| Car size [large]               | 1.45 [0.49, 2.41]    | <b>0.003</b>     | 1.14 [1.05, 1.23]                   | <b>0.002</b> | 0.81 [-0.22, 1.83]   | 0.124            | 1.10 [1.00, 1.20]                     | <b>0.043</b>     |
| Price [medium]                 | -0.13 [-0.31, 0.04]  | 0.141            | 0.99 [0.95, 1.03]                   | 0.515        | -0.19 [-0.37, -0.02] | <b>0.032</b>     | 0.99 [0.95, 1.03]                     | 0.488            |
| Price [high]                   | -0.26 [-0.44, -0.09] | <b>0.004</b>     | 0.98 [0.94, 1.02]                   | 0.365        | -0.24 [-0.42, -0.06] | <b>0.008</b>     | 0.96 [0.92, 1.00]                     | 0.055            |
| Savings [medium]               | 0.07 [-0.11, 0.24]   | 0.472            | 0.98 [0.94, 1.02]                   | 0.327        | -0.09 [-0.27, 0.09]  | 0.310            | 1.03 [0.99, 1.08]                     | 0.091            |
| Savings [high]                 | -0.03 [-0.21, 0.14]  | 0.709            | 1.00 [0.96, 1.04]                   | 0.901        | 0.02 [-0.15, 0.20]   | 0.784            | 1.01 [0.97, 1.05]                     | 0.511            |
| Range [medium]                 | 0.58 [0.40, 0.76]    | <b>&lt;0.001</b> | 1.02 [0.98, 1.06]                   | 0.365        | 0.28 [0.10, 0.46]    | <b>0.002</b>     | 1.02 [0.98, 1.06]                     | 0.353            |
| Range [high]                   | 0.67 [0.50, 0.85]    | <b>&lt;0.001</b> | 1.04 [1.00, 1.08]                   | 0.069        | 0.37 [0.19, 0.54]    | <b>&lt;0.001</b> | 1.05 [1.01, 1.09]                     | <b>0.019</b>     |
| Emissions [medium]             | -0.03 [-0.20, 0.15]  | 0.765            | 1.00 [0.96, 1.04]                   | 0.953        | 0.08 [-0.09, 0.26]   | 0.350            | 1.02 [0.98, 1.06]                     | 0.366            |
| Emissions [high]               | 0.03 [-0.14, 0.21]   | 0.704            | 1.00 [0.96, 1.04]                   | 0.982        | 0.06 [-0.12, 0.23]   | 0.537            | 1.00 [0.97, 1.05]                     | 0.821            |
| Neighbourhood [medium]         | 0.02 [-0.16, 0.20]   | 0.818            | 1.01 [0.97, 1.05]                   | 0.693        | -0.16 [-0.34, 0.01]  | 0.072            | 0.98 [0.94, 1.02]                     | 0.332            |
| Neighbourhood [high]           | -0.02 [-0.20, 0.16]  | 0.831            | 0.98 [0.94, 1.02]                   | 0.357        | -0.01 [-0.19, 0.17]  | 0.932            | 1.00 [0.96, 1.04]                     | 0.929            |
| Carbon tax [Yes]               | 0.60 [0.46, 0.75]    | <b>&lt;0.001</b> | 1.05 [1.02, 1.09]                   | <b>0.002</b> | -0.08 [-0.23, 0.06]  | 0.266            | 1.01 [0.98, 1.04]                     | 0.571            |
| Information intervention [Yes] | -0.23 [-0.37, -0.08] | <b>0.002</b>     | 0.99 [0.96, 1.02]                   | 0.497        | 0.89 [0.75, 1.04]    | <b>&lt;0.001</b> | 1.06 [1.03, 1.10]                     | <b>&lt;0.001</b> |
| Age                            | -0.12 [-0.45, 0.20]  | 0.457            | 1.00 [0.97, 1.03]                   | 0.990        | 0.39 [0.04, 0.75]    | <b>0.030</b>     | 1.03 [1.00, 1.06]                     | 0.098            |
| Income                         | 0.11 [-0.22, 0.44]   | 0.519            | 1.00 [0.98, 1.03]                   | 0.804        | 0.01 [-0.34, 0.37]   | 0.944            | 1.00 [0.97, 1.03]                     | 0.931            |
| Political orientation          | -0.13 [-0.45, 0.19]  | 0.432            | 0.99 [0.96, 1.02]                   | 0.506        | -0.15 [-0.49, 0.19]  | 0.389            | 0.99 [0.96, 1.02]                     | 0.471            |
| <b>Random effects</b>          |                      |                  |                                     |              |                      |                  |                                       |                  |
| $\sigma^2$                     | 139.47               |                  | 3.29                                |              | 75.09                |                  | 3.29                                  |                  |
| $\tau_{00}$ participant_id     | 38.91                |                  | 0.19                                |              | 39.73                |                  | 0.24                                  |                  |

|                                                         |               |                  |               |               |
|---------------------------------------------------------|---------------|------------------|---------------|---------------|
| $\tau_{00}$ country                                     | 0.32          | 0.00             | 0.12          | 0.01          |
| ICC                                                     | 0.22          | 0.05             | 0.35          | 0.07          |
| N participant_id                                        | 1589          | 1589             | 1589          | 1589          |
| N country                                               | 4             | 4                | 4             | 4             |
| Observations                                            | 101982        | 101982           | 101982        | 101982        |
| Marginal R <sup>2</sup> /<br>Conditional R <sup>2</sup> | 0.003 / 0.222 | 0.001 /<br>0.055 | 0.003 / 0.252 | 0.001 / 0.071 |

**Supplementary Table 16. Sensitivity analysis: Multilevel regression results for attention allocation with excluding trials with a response time above a cut-off value of three median absolute deviations above the median, as preregistered, including the interaction between interventions**

|                                | Frequency of savings |                  | Likelihood of viewing savings first |          | Frequency emissions  |                  | Likelihood of viewing emissions first |              |
|--------------------------------|----------------------|------------------|-------------------------------------|----------|----------------------|------------------|---------------------------------------|--------------|
|                                | <i>b</i> [CI]        | <i>p</i>         | OR [CI]                             | <i>p</i> | <i>b</i> [CI]        | <i>p</i>         | OR [CI]                               | <i>p</i>     |
| <b>Fixed effects</b>           |                      |                  |                                     |          |                      |                  |                                       |              |
| Intercept                      | 16.92 [15.95, 17.90] |                  | 0.19 [0.17, 0.21]                   |          | 17.01 [15.37, 18.66] |                  | 0.18 [0.16, 0.21]                     |              |
| Car size [medium]              | 0.70 [-0.18, 1.58]   | 0.118            | 1.05 [0.97, 1.13]                   | 0.229    | 0.10 [-0.84, 1.04]   | 0.832            | 1.04 [0.96, 1.13]                     | 0.317        |
| Car size [large]               | 1.45 [0.49, 2.41]    | 0.003            | 1.14 [1.05, 1.23]                   | 0.002    | 0.81 [-0.22, 1.83]   | 0.124            | 1.10 [1.00, 1.20]                     | 0.043        |
| Price [medium]                 | -0.13 [-0.31, 0.04]  | 0.142            | 0.99 [0.95, 1.03]                   | 0.516    | -0.19 [-0.37, -0.02] | 0.032            | 0.99 [0.95, 1.03]                     | 0.486        |
| Price [high]                   | -0.26 [-0.44, -0.09] | 0.004            | 0.98 [0.94, 1.02]                   | 0.365    | -0.24 [-0.42, -0.06] | <b>0.008</b>     | 0.96 [0.92, 1.00]                     | 0.055        |
| Savings [medium]               | 0.07 [-0.11, 0.24]   | 0.473            | 0.98 [0.94, 1.02]                   | 0.326    | -0.09 [-0.27, 0.09]  | 0.312            | 1.04 [0.99, 1.08]                     | <b>0.090</b> |
| Savings [high]                 | -0.03 [-0.21, 0.14]  | 0.708            | 1.00 [0.96, 1.04]                   | 0.900    | 0.03 [-0.15, 0.20]   | 0.782            | 1.01 [0.97, 1.05]                     | 0.509        |
| Range [medium]                 | 0.58 [0.40, 0.76]    | <b>&lt;0.001</b> | 1.02 [0.98, 1.06]                   | 0.367    | 0.28 [0.10, 0.46]    | <b>0.002</b>     | 1.02 [0.98, 1.06]                     | 0.349        |
| Range [high]                   | 0.67 [0.50, 0.85]    | <b>&lt;0.001</b> | 1.04 [1.00, 1.08]                   | 0.069    | 0.37 [0.19, 0.54]    | <b>&lt;0.001</b> | 1.05 [1.01, 1.09]                     | 0.019        |
| Emissions [medium]             | -0.03 [-0.21, 0.15]  | 0.761            | 1.00 [0.96, 1.04]                   | 0.956    | 0.09 [-0.09, 0.26]   | 0.346            | 1.02 [0.98, 1.06]                     | 0.361        |
| Emissions [high]               | 0.03 [-0.14, 0.21]   | 0.704            | 1.00 [0.96, 1.04]                   | 0.982    | 0.06 [-0.12, 0.23]   | 0.537            | 1.00 [0.97, 1.05]                     | 0.820        |
| Neighbourhood [medium]         | 0.02 [-0.16, 0.20]   | 0.816            | 1.01 [0.97, 1.05]                   | 0.692    | -0.16 [-0.34, 0.01]  | 0.072            | 0.98 [0.94, 1.02]                     | 0.330        |
| Neighbourhood [high]           | -0.02 [-0.20, 0.16]  | 0.830            | 0.98 [0.94, 1.02]                   | 0.356    | -0.01 [-0.18, 0.17]  | 0.935            | 1.00 [0.96, 1.04]                     | 0.931        |
| Carbon tax [Yes]               | 0.75 [0.55, 0.96]    | <b>&lt;0.001</b> | 1.08 [1.03, 1.13]                   | 0.001    | -0.37 [-0.57, -0.16] | <b>&lt;0.001</b> | 0.95 [0.90, 0.99]                     | 0.021        |
| Information intervention [Yes] | -0.08 [-0.29, 0.12]  | 0.441            | 1.02 [0.97, 1.06]                   | 0.480    | 0.61 [0.40, 0.81]    | <b>&lt;0.001</b> | 1.00 [0.95, 1.05]                     | 0.939        |
| Age                            | -0.12 [-0.45, 0.20]  | 0.457            | 1.00 [0.97, 1.03]                   | 0.990    | 0.39 [0.04, 0.75]    | 0.030            | 1.03 [1.00, 1.06]                     | 0.098        |
| Income                         | 0.11 [-0.22, 0.44]   | 0.520            | 1.00 [0.98, 1.03]                   | 0.806    | 0.01 [-0.34, 0.37]   | 0.942            | 1.00 [0.97, 1.03]                     | 0.936        |
| Political orientation          | -0.13 [-0.45, 0.19]  | 0.432            | 0.99 [0.96, 1.02]                   | 0.506    | -0.15 [-0.49, 0.19]  | 0.389            | 0.99 [0.96, 1.02]                     | 0.471        |

|                                                      |                       |                   |       |                   |        |                   |        |
|------------------------------------------------------|-----------------------|-------------------|-------|-------------------|--------|-------------------|--------|
| Carbon tax [Yes] × Information intervention [Yes]    | -0.29 [-0.58, -0.049] | 0.95 [0.89, 1.01] | 0.096 | 0.58 [0.29, 0.87] | <0.001 | 1.13 [1.06, 1.21] | <0.001 |
| <b>Random effects</b>                                |                       |                   |       |                   |        |                   |        |
| $\sigma^2$                                           | 139.47                | 3.29              |       | 139.28            |        | 3.29              |        |
| $\tau_{00}$ participant_id                           | 38.91                 | 0.19              |       | 44.37             |        | 0.24              |        |
| $\tau_{00}$ country                                  | 2.08                  | 0.01              |       | 0.12              |        | 0.01              |        |
| ICC                                                  | 0.22                  | 0.05              |       | 0.25              |        | 0.07              |        |
| N participant_id                                     | 1598                  | 1598              |       | 1598              |        | 1598              |        |
| N country                                            | 4                     | 4                 |       | 4                 |        | 4                 |        |
| Observations                                         | 101982                | 101982            |       | 101982            |        | 101982            |        |
| Marginal R <sup>2</sup> / Conditional R <sup>2</sup> | 0.003 / 0.222         | 0.001 / 0.055     |       | 0.003 / 0.252     |        | 0.001 / 0.071     |        |



**Supplementary Table 17. Adoption thresholds for EV adoption in ABM simulations based on Matthews Correlation Coefficient (MCC)**

|                     | Threshold | Small EV          | Medium EV         | Large EV          |
|---------------------|-----------|-------------------|-------------------|-------------------|
| <b>Mexico</b>       | 0.05      | 0.47567866        | 0.43875093        | 0.56678438        |
|                     | 0.1       | 0.5648422         | 0.53295209        | 0.64968551        |
|                     | 0.15      | 0.62070837        | 0.59374456        | 0.69967399        |
|                     | 0.2       | 0.66082575        | 0.64095843        | 0.73916518        |
|                     | 0.25      | 0.69508298        | 0.67846265        | 0.77454744        |
|                     | 0.3       | 0.72587821        | 0.70400995        | 0.79235492        |
|                     | 0.35      | 0.74305651        | 0.72349457        | 0.79452467        |
|                     | 0.4       | 0.75721786        | 0.73306422        | 0.81170732        |
|                     | 0.45      | 0.76865893        | 0.74289365        | 0.81331915        |
|                     | 0.5       | <b>0.77696061</b> | <b>0.74857129</b> | <b>0.81930663</b> |
|                     | 0.55      | 0.76987475        | 0.74649088        | 0.81412754        |
|                     | 0.6       | 0.7669583         | 0.73825378        | 0.80702052        |
|                     | 0.65      | 0.75496686        | 0.72313551        | 0.79658968        |
|                     | 0.7       | 0.74021297        | 0.70417223        | 0.78266502        |
|                     | 0.75      | 0.71491783        | 0.67905498        | 0.76678095        |
|                     | 0.8       | 0.68631987        | 0.64609415        | 0.73609905        |
|                     | 0.85      | 0.65174069        | 0.6040703         | 0.69840469        |
|                     | 0.9       | 0.59773049        | 0.54204377        | 0.66081908        |
|                     | 0.95      | 0.50911657        | 0.44483082        | 0.57718263        |
|                     | 1         | 0                 | 0                 | 0                 |
| <b>South Africa</b> | 0.05      | 0.38879624        | 0.40120483        | 0.3584761         |
|                     | 0.1       | 0.48950369        | 0.49990976        | 0.4610751         |
|                     | 0.15      | 0.55444263        | 0.55984481        | 0.53243295        |
|                     | 0.2       | 0.60532447        | 0.6098948         | 0.5706388         |
|                     | 0.25      | 0.6465513         | 0.64140061        | 0.60178198        |
|                     | 0.3       | 0.67727657        | 0.66928424        | 0.6386677         |
|                     | 0.35      | 0.69913906        | 0.69214806        | 0.66013338        |
|                     | 0.4       | 0.71087168        | 0.70500715        | 0.67277017        |
|                     | 0.45      | 0.71904016        | 0.71709103        | 0.67928782        |
|                     | 0.5       | 0.72139414        | 0.7214309         | 0.68387725        |
|                     | 0.55      | <b>0.7224669</b>  | <b>0.7233394</b>  | <b>0.69373363</b> |
|                     | 0.6       | 0.71846014        | 0.71992668        | 0.68773568        |
|                     | 0.65      | 0.70941916        | 0.70802977        | 0.6772074         |
|                     | 0.7       | 0.68390597        | 0.68946273        | 0.65851262        |
|                     | 0.75      | 0.6668481         | 0.6642268         | 0.63763607        |
|                     | 0.8       | 0.63854098        | 0.62852808        | 0.59452617        |
|                     | 0.85      | 0.59606413        | 0.58267425        | 0.54949447        |
|                     | 0.9       | 0.52588893        | 0.51876043        | 0.48799149        |
|                     | 0.95      | 0.42837165        | 0.43022575        | 0.39798969        |
|                     | 1         | 0                 | 0                 | 0                 |
| <b>USA</b>          | 0.05      | 0.55460343        | 0.57945057        | 0.61343626        |
|                     | 0.1       | 0.62697642        | 0.64581391        | 0.68352051        |
|                     | 0.15      | 0.67046848        | 0.68712438        | 0.73242232        |
|                     | 0.2       | 0.70838706        | 0.72299471        | 0.76180624        |

|           | Threshold | Small EV          | Medium EV         | Large EV          |
|-----------|-----------|-------------------|-------------------|-------------------|
|           | 0.25      | 0.73504721        | 0.74660398        | 0.78408462        |
|           | 0.3       | 0.76061421        | 0.76706248        | 0.79678171        |
|           | 0.35      | 0.77606226        | 0.77921651        | 0.81062427        |
|           | 0.4       | 0.78764054        | 0.79222763        | 0.81583766        |
|           | 0.45      | 0.79590034        | <b>0.79583958</b> | 0.81669057        |
|           | 0.5       | <b>0.79730212</b> | 0.79492529        | <b>0.81872465</b> |
|           | 0.55      | 0.79233213        | 0.79212102        | 0.81481377        |
|           | 0.6       | 0.78646969        | 0.7864248         | 0.80321809        |
|           | 0.65      | 0.77715431        | 0.77185337        | 0.78742852        |
|           | 0.7       | 0.76369067        | 0.75216938        | 0.76365388        |
|           | 0.75      | 0.74614329        | 0.72648083        | 0.74060351        |
|           | 0.8       | 0.71720597        | 0.69098026        | 0.70397319        |
|           | 0.85      | 0.68462228        | 0.64677254        | 0.65917957        |
|           | 0.9       | 0.63288442        | 0.59432304        | 0.58887414        |
|           | 0.95      | 0.55799056        | 0.50135042        | 0.49085536        |
|           | 1         | 0                 | 0                 | 0                 |
| <b>UK</b> | 0.05      | 0.62320844        | 0.61572794        | 0.64515784        |
|           | 0.1       | 0.7024404         | 0.696631          | 0.7255681         |
|           | 0.15      | 0.74762113        | 0.7444894         | 0.77192039        |
|           | 0.2       | 0.77917982        | 0.77905882        | 0.8026893         |
|           | 0.25      | 0.80059787        | 0.80154085        | 0.81832201        |
|           | 0.3       | 0.81702424        | 0.81760165        | 0.83263736        |
|           | 0.35      | 0.82885721        | 0.8265217         | 0.84258824        |
|           | 0.4       | 0.83893928        | 0.83403107        | 0.84349237        |
|           | 0.45      | 0.84735386        | 0.84061966        | 0.84355094        |
|           | 0.5       | 0.84749874        | <b>0.84235024</b> | <b>0.84851609</b> |
|           | 0.55      | <b>0.84795189</b> | 0.83997959        | 0.8453183         |
|           | 0.6       | 0.84330429        | 0.83752957        | 0.83714381        |
|           | 0.65      | 0.83310563        | 0.83181661        | 0.82470228        |
|           | 0.7       | 0.82100676        | 0.8216776         | 0.80934147        |
|           | 0.75      | 0.80107834        | 0.80384873        | 0.78226806        |
|           | 0.8       | 0.77216056        | 0.78054366        | 0.7501613         |
|           | 0.85      | 0.73769078        | 0.75237928        | 0.70618452        |
|           | 0.9       | 0.695018          | 0.70368485        | 0.64715655        |
|           | 0.95      | 0.60241514        | 0.62688248        | 0.56810984        |
|           | 1         | 0                 | 0                 | 0                 |

**Note.** For each country and car size, the threshold that maximizes the MCC is selected. An MCC of 1.0 indicates perfect classification, 0.0 indicates performance no better than chance. MCC for binary classification of electric vehicle choices, based on model-predicted probabilities across varying thresholds.

**Supplementary Table 18. Agent-based model: Agent-level variables**

| Name                                        | Description                                                                                 | Domain                                                 |
|---------------------------------------------|---------------------------------------------------------------------------------------------|--------------------------------------------------------|
| <b>General</b>                              |                                                                                             |                                                        |
| Survey profile                              | One row of the survey data corresponding to one respondent                                  | survey data row (list)                                 |
| ID number                                   | ID number of the agent, correspond to survey respondent number                              | integer $\geq 0$                                       |
| Region                                      | In which type of region the agent lives                                                     | {0=urban, 0.5=suburban, 1=rural}                       |
| Education level                             | Education level (coded from obligatory school to doctorate)                                 | [0, 1]                                                 |
| Income level                                | Income level (coded from lowest to highest income category)                                 | [0, 1]                                                 |
| <b>Car</b>                                  |                                                                                             |                                                        |
| Car ownership                               | Whether the agent owns a car                                                                | {true, false}                                          |
| Current car                                 | Link to the agent's current car (ICE, EV, or HEV)                                           | agent reference                                        |
| Car size                                    | Size of the car the agent is interested in buying                                           | {"small", "medium", "large"}                           |
| Car replacement time                        | After how many years the car will be replaced                                               | {1, 4, 8, 12, random (12–20)}                          |
| Car age                                     | Age of the car                                                                              | integer $\geq 0$ years                                 |
| Adoption status                             | Whether an agent without a car will adopt in the future                                     | {"current-adopter", "future-adopter", "never-adopter"} |
| Future adoption year                        | Year (relative to simulation start) when future adopters evaluate EVs                       | integer (0–9)                                          |
| Opinion EV                                  | Opinion on EVs after adoption                                                               | {"positive", "neutral", "negative"}                    |
| <b>Social network</b>                       |                                                                                             |                                                        |
| Number of peers                             | Number of links to peers an agent has                                                       | integer (0–10)                                         |
| Homophily preference: region                | Degree to which the agent prefers connecting with others from the same region type          | [0, 1]                                                 |
| Homophily preference: education             | Degree to which the agent prefers connecting with others with similar education             | [0, 1]                                                 |
| Homophily preference: income                | Degree to which the agent prefers connecting with others with similar income                | [0, 1]                                                 |
| Homophily preference: political orientation | Degree to which the agent prefers connecting with others with similar political orientation | [0, 1]                                                 |
| <b>Psychological characteristics</b>        |                                                                                             |                                                        |
| Affect EV                                   | How the agent feels about EVs from very negative to very positive                           | [0, 1]                                                 |
| Political orientation                       | Political orientation of agent from left to right                                           | [0, 1]                                                 |
| Climate change concern                      | Climate change concern from low to high                                                     | [0, 1]                                                 |
| <b>Adoption model</b>                       |                                                                                             |                                                        |
| <b>Subjective probabilities (SP)</b>        |                                                                                             |                                                        |
| SP: savings                                 | Reported perceived probability that EV adoption reduces agents' expenses                    | [0, 1]                                                 |
| SP: collective action                       | Reported perceived probability that EV adoption contributes to collective action            | [0, 1]                                                 |

| Name                                                      | Description                                                                                                                                                       | Domain                                                                              |
|-----------------------------------------------------------|-------------------------------------------------------------------------------------------------------------------------------------------------------------------|-------------------------------------------------------------------------------------|
| SP: independence                                          | Reported perceived probability that EV adoption increases the agents' independence                                                                                | [0, 1]                                                                              |
| SP: investment costs                                      | Reported perceived probability that the investment cost for an EV is too high                                                                                     | [0, 1]                                                                              |
| SP: return on investment                                  | Reported perceived probability that the return on investment for an EV is too low                                                                                 | [0, 1]                                                                              |
| <b>Regression model: intercept and coefficients</b>       |                                                                                                                                                                   |                                                                                     |
| Intercept                                                 | Value of choice function when all other variables are set to zero                                                                                                 | Dimensionless                                                                       |
| Betas: investment costs                                   | Change in choice function associated with the importance the agent attributes to investment cost                                                                  | \$10,000 (USA); £10,000 (UK); R10,000 (ZA); MXN\$10,000 (MX)                        |
| Betas: savings                                            | Change in choice function associated with the importance the agent attributes to operating cost savings after adoption                                            | \$ / 100 miles (USA); £10 / 100 miles (UK); R10 / 100km (ZA); MXN\$10 / 100 km (MX) |
| Betas: life cycle greenhouse gas emissions                | Change in choice function associated with the importance the agent attributes to lifecycle GHG emissions                                                          | 10t GHG lifetime emissions (USA, UK)<br>1t GHG lifetime emissions (ZA, MX)          |
| Betas: battery range                                      | Change in choice function based on importance the agent attributes to independence                                                                                | 100 miles                                                                           |
| Betas: Indirect peer effect                               | Change in choice function based on importance the agent attributes to the percentage of other agents that have adopted EVs                                        | 10% of other adopters (USA, UK)<br>1% of other adopters (MX, ZA)                    |
| Betas: subjective probabilities                           | Change in choice function based on subjective probability values                                                                                                  | Dimensionless                                                                       |
| Betas: Affect towards EVs                                 | Change in choice function based on agents' affect toward EVs                                                                                                      | Dimensionless                                                                       |
| Betas: Political orientation                              | Change in choice function based on agents' political orientation                                                                                                  | Dimensionless                                                                       |
| Betas: Climate change concern                             | Change in choice function based on agents' climate change concern                                                                                                 | Dimensionless                                                                       |
| Betas: Carbon tax [low tax]                               | Change in choice function based on the importance the agent attributes to the implementation of a low carbon tax                                                  | Dimensionless                                                                       |
| Betas: Carbon tax [high tax]                              | Change in choice function based on the importance the agent attributes to the implementation of a high carbon tax                                                 | Dimensionless                                                                       |
| Betas: Climate impact information                         | Change in choice function based on the importance the agent attributes to the implementation of a climate impact information intervention                         | Dimensionless                                                                       |
| Betas: Carbon tax [low tax] x Climate impact information  | Change in choice function based on the importance the agent attributes to the joint implementation of low carbon tax and climate impact information intervention  | Dimensionless                                                                       |
| Betas: Carbon tax [high tax] x Climate impact information | Change in choice function based on the importance the agent attributes to the joint implementation of high carbon tax and climate impact information intervention | Dimensionless                                                                       |

**Supplementary Table 19. Agent-based model: State variables of the environment**

| <b>Name</b>              | <b>Description</b>                               | <b>Unit</b>                     |
|--------------------------|--------------------------------------------------|---------------------------------|
| <b>General</b>           |                                                  |                                 |
| Year                     | Year in the simulation, starts in 2024           | Years                           |
| Adoption thresholds      | Threshold values to adopt EV (for each car size) | [0, 1]                          |
| <b>EV attributes</b>     |                                                  |                                 |
| Price                    | Price of EVs before subsidy (for each car size)  | Local currency                  |
| Learning rate            | Yearly decrease in EV price before subsidy       | %                               |
| Minimum price            | Minimum price for EVs (for each EV car size)     | Local currency                  |
| Life cycle GHG emissions | Life cycle greenhouse gas emissions of EVs       | tCO <sub>2</sub> -eq / lifetime |
| EV range                 | Range of EVs (for each car size)                 | Miles or km                     |
| Range increase           | Yearly increase in EV range (linear increase)    | Miles or km / year              |
| <b>Policies</b>          |                                                  |                                 |
| Gasoline tax             | Tax imposed on gasoline                          | {none, low, high}               |
| Climate label on cars    | Manufacturer label on cars                       | {true, false}                   |

**Supplementary Table 20. Agent-based model: Technology-related variables fixed at initialization**

| Variable                            |               | Initial value                                                                             | Source                                                                                                |
|-------------------------------------|---------------|-------------------------------------------------------------------------------------------|-------------------------------------------------------------------------------------------------------|
| Adoption threshold                  | Mexico        | Small EV: 0.50                                                                            | Own calculation (see Table S17)                                                                       |
|                                     |               | Medium EV: 0.50                                                                           |                                                                                                       |
|                                     |               | Large EV: 0.50                                                                            |                                                                                                       |
|                                     | South Africa  | Small EV: 0.55                                                                            | Own calculation (see Table S17)                                                                       |
|                                     |               | Medium EV: 0.55                                                                           |                                                                                                       |
|                                     |               | Large EV: 0.55                                                                            |                                                                                                       |
|                                     | USA           | Small EV: 0.5                                                                             | Own calculation (see Table S17)                                                                       |
|                                     |               | Medium EV: 0.45                                                                           |                                                                                                       |
|                                     |               | Large EV: 0.5                                                                             |                                                                                                       |
|                                     | UK            | Small EV: 0.55                                                                            | Own calculation (see Table S17)                                                                       |
|                                     |               | Medium EV: 0.50                                                                           |                                                                                                       |
|                                     |               | Large EV: 0.50                                                                            |                                                                                                       |
| Price                               | Mexico        | Small EV: \$MXN291,000                                                                    | Same as EV choice experiment (see Table S12)                                                          |
|                                     |               | Medium EV: \$MXN436,000                                                                   |                                                                                                       |
|                                     |               | Large EV: \$MXN950,000                                                                    |                                                                                                       |
|                                     | South Africa  | Small EV: R210,000                                                                        | Same as EV choice experiment (see Table S12)                                                          |
|                                     |               | Medium EV: R315,000                                                                       |                                                                                                       |
|                                     |               | Large EV: R686,000                                                                        |                                                                                                       |
|                                     | USA           | Small EV: \$30,000                                                                        | Same as EV choice experiment (see Table S12)                                                          |
|                                     |               | Medium EV: \$45,000                                                                       |                                                                                                       |
|                                     |               | Large EV: \$98,000                                                                        |                                                                                                       |
|                                     | UK            | Small EV: £21,000                                                                         | Same as EV choice experiment (see Table S12)                                                          |
|                                     |               | Medium EV: £31,500                                                                        |                                                                                                       |
|                                     |               | Large EV: £68,000                                                                         |                                                                                                       |
| Learning rate price                 | All countries | Small EV: 0.976                                                                           | Calculated based on price data (see Table S12) using learning curve function (see Note <sup>a</sup> ) |
|                                     |               | Medium EV: 0.981                                                                          |                                                                                                       |
|                                     |               | Large EV: 0.988                                                                           |                                                                                                       |
| Life cycle greenhouse gas emissions | Mexico        | Current trajectory: 29.6 tCO <sub>2e</sub><br>2°C policy scenario: 25.0 tCO <sub>2e</sub> | Calculation based on ref. <sup>1</sup>                                                                |
|                                     | South Africa  | Current trajectory: 45.1 tCO <sub>2e</sub><br>2°C policy scenario: 47.1 tCO <sub>2e</sub> | Calculation based on ref. <sup>1</sup>                                                                |
|                                     | USA           | Current trajectory: 30.2 tCO <sub>2e</sub><br>2°C policy scenario: 23.7 tCO <sub>2e</sub> | Calculation based on ref. <sup>1</sup>                                                                |
|                                     | UK            | Current trajectory: 26.4 tCO <sub>2e</sub><br>2°C policy scenario: 22.3 tCO <sub>2e</sub> | Calculation based on ref. <sup>1</sup>                                                                |
| EV range                            | Mexico        | Small EV: 156 km                                                                          | ref. <sup>15</sup>                                                                                    |
|                                     |               | Medium EV: 352 km                                                                         |                                                                                                       |
|                                     |               | Large EV: 392 km                                                                          |                                                                                                       |
|                                     | South Africa  | Small EV: 156 km                                                                          | ref. <sup>15</sup>                                                                                    |
|                                     |               | Medium EV: 352 km                                                                         |                                                                                                       |
|                                     |               | Large EV: 392 km                                                                          |                                                                                                       |
|                                     | USA           | Small EV: 97 miles                                                                        | ref. <sup>15</sup>                                                                                    |
|                                     |               | Medium EV: 219 miles                                                                      |                                                                                                       |
|                                     |               | Large EV: 244 miles                                                                       |                                                                                                       |
|                                     | UK            | Small EV: 97 miles                                                                        | ref. <sup>15</sup>                                                                                    |
|                                     |               | Medium EV: 219 miles                                                                      |                                                                                                       |
|                                     |               | Large EV: 244 miles                                                                       |                                                                                                       |

| Variable       |              | Initial value                | Source                                                           |
|----------------|--------------|------------------------------|------------------------------------------------------------------|
| Range increase | Mexico       | Small EV: 1.41 km / year     | Calculation based on ref. <sup>15</sup> (see Note <sup>b</sup> ) |
|                |              | Medium EV: 23.6 km / year    |                                                                  |
|                |              | Large EV: 13.8 km / year     |                                                                  |
|                | South Africa | Small EV: 1.41 km / year     | Calculation based on ref. <sup>15</sup> (see Note <sup>b</sup> ) |
|                |              | Medium EV: 23.6 km / year    |                                                                  |
|                |              | Large EV: 13.8 km / year     |                                                                  |
|                | USA          | Small EV: 0.9 miles / year   | Calculation based on ref. <sup>15</sup> (see Note <sup>b</sup> ) |
|                |              | Medium EV: 14.7 miles / year |                                                                  |
|                |              | Large EV: 8.5 miles / year   |                                                                  |
|                | UK           | Small EV: 0.9 miles / year   | Calculation based on ref. <sup>15</sup> (see Note <sup>b</sup> ) |
|                |              | Medium EV: 14.7 miles / year |                                                                  |
|                |              | Large EV: 8.5 miles / year   |                                                                  |

**Note.** <sup>a</sup> The annual price reduction factor was calculated as  $(\frac{P_{final}}{P_{initial}})^{\frac{1}{t}}$ , where  $P_{initial}$  is the starting EV price,  $P_{final}$  is the assumed minimum price (equal to the current price of an equivalent ICEV), and  $t$  is the number of years until the minimum price is reached. EV prices were multiplied by this factor each year, producing a stronger decline in the beginning that slows as prices approach the minimum. <sup>b</sup> EV range increases were projected using a linear trend based on sales-weighted average range data for battery electric vehicles from 2015 to 2024<sup>15</sup>. Linear regressions were fitted to these data, and resulting coefficients were used as estimated annual increase in battery range.

## References

1. Knobloch, F. *et al.* Net emission reductions from electric cars and heat pumps in 59 world regions over time. *Nat. Sustain.* **3**, 437–447 (2020).
2. INEGI. *Perfil sociodemográfico de la población afrodescendiente en México, Censo de Población y Vivienda 2020*.  
[https://en.www.inegi.org.mx/contenidos/productos/prod\\_serv/contenidos/espanol/bvinegi/productos/nueva\\_estruc/889463921431.pdf](https://en.www.inegi.org.mx/contenidos/productos/prod_serv/contenidos/espanol/bvinegi/productos/nueva_estruc/889463921431.pdf) (2024).
3. OECD. Household disposable income.  
<https://www.oecd.org/en/data/indicators/household-disposable-income.html> (2024).
4. OECD. *Education at a Glance 2023: OECD Indicators*. (OECD Publishing, Paris, 2023).  
doi:10.1787/e13bef63-en.
5. Stats SA. *South African Age-Sex Structure, 1996-2022: Is the Population Ageing?*  
<https://www.statssa.gov.za/publications/Report-03-00-23/Report-03-00-232022.pdf>  
(2025).
6. Stats SA. *Mid-Year Population Estimates*.  
<https://www.statssa.gov.za/publications/P0302/P03022025.pdf> (2025).
7. U.S. Census Bureau. Median Age by Sex. *American Community Survey, ACS 1-Year Estimates Detailed Tables, Table B01002*  
<https://data.census.gov/table/ACSDT1Y2023.B01002>.
8. U.S. Census Bureau. ACS DEMOGRAPHIC AND HOUSING ESTIMATES. *American Community Survey, ACS 1-Year Estimates Data Profiles, Table DP05*.  
<https://data.census.gov/table/ACSDP1Y2017.DP05?q=United+States&g=010XX00US>.
9. Guzman, G. & Kollar, M. *Income in the United States: 2022*.  
<https://www.census.gov/content/dam/Census/library/publications/2023/demo/p60-279.pdf> (2023).
10. Office for National Statistics. Population estimates for the UK, England, Wales, Scotland, and Northern Ireland: mid-2022.



- <https://www.ons.gov.uk/peoplepopulationandcommunity/populationandmigration/populationestimates/bulletins/annualmidyearpopulationestimates/mid2022> (2024).
11. Office for National Statistics. Estimates of the population for the UK, England, Wales, Scotland, and Northern Ireland. (2024).
  12. Office for National Statistics. Average household income, UK: Financial Year Ending 2024.  
<https://www.ons.gov.uk/peoplepopulationandcommunity/personalandhouseholdfinances/incomeandwealth/bulletins/householddisposableincomeandinequality/financialyearending2024> (2025).
  13. Autocosmos. Autos nuevos. <https://www.autocosmos.com.mx/catalogo>.
  14. IEA. *Evolution of Average Range of Electric Vehicles by Powertrain, 2010-2021*.  
<https://www.iea.org/data-and-statistics/charts/evolution-of-average-range-of-electric-vehicles-by-powertrain-2010-2021> (2022).
  15. IEA. *Sales-Weighted Average Range of Battery Electric Cars by Segment, 2015-2024*.  
<https://www.iea.org/data-and-statistics/charts/sales-weighted-average-range-of-battery-electric-cars-by-segment-2015-2024> (2024).
  16. IEA. *Global EV Outlook 2024*. <https://iea.blob.core.windows.net/assets/a9e3544b-0b12-4e15-b407-65f5c8ce1b5f/GlobalEVOutlook2024.pdf> (2024).
  17. Carmag. Car Price Guide. <https://www.carmag.co.za/car-price-guide/>.
  18. U.S. News. Cars and Trucks. <https://cars.usnews.com/cars-trucks/browse>.
  19. Autotrader. New cars. <https://www.autotrader.co.uk/cars/new>.
  20. EV Database. Energy consumption of full electric vehicles. *Electric vehicle database*  
<https://ev-database.org/cheatsheet/energy-consumption-electric-car>.
  21. U.S. Department of Energy. *Fuel Economy Guide 2024*.  
<https://www.fueleconomy.gov/feg/pdfs/guides/feg2024.pdf> (2024).
  22. Worldbank. State and Trends of Carbon Pricing Dashboard. *Carbon Pricing Dashboard*  
<https://carbonpricingdashboard.worldbank.org>.
